# Supplementary material
Source: ML conference proceedings conference paper supplement (https://proceedings.mlr.press/v139/chitra21a.html)
Supplement: Supplementary file 1 [file chitra21a-supp.zip]

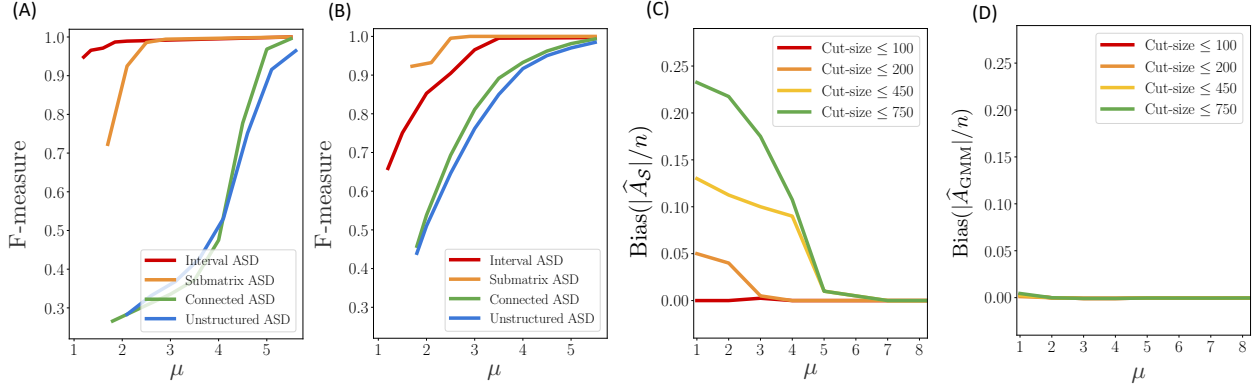

Figure S1: Data  $\mathbf{X} = (X_1, \dots, X_n) \sim \text{ASD}_{\mathcal{S}}(A, \mu)$  as in Figure 2 in main text. (A) F-measure of the MLE  $\hat{A}_S$  versus  $\mu$  for means  $\mu \geq \mu_{\text{detect}}$ . Note that the MLEs  $\hat{A}_S$  for the connected family  $\mathcal{S} = \mathcal{C}_G$  and unstructured family  $\mathcal{S} = \mathcal{P}_n$  have low F-measure for small means  $\mu$ , consistent with the Bias( $|\hat{A}_S|/n$ ) for these families shown in Figure 2. (B) F-measure of our estimator  $\hat{A}_{\text{GMM}}$  versus  $\mu$  for means  $\mu \geq \mu_{\text{detect}}$ . (C) Bias( $|\hat{A}_S|/n$ ) of the MLE versus  $\mu$  for means  $\mu \geq 1$  and for graph cut family  $\mathcal{S} = \mathcal{T}_{G,\rho}$  with different bounds  $\rho$  on the cut-size and. (D) Bias( $|\hat{A}_{\text{GMM}}|/n$ ) of our GMM estimator versus  $\mu$  for means  $\mu \geq 1$  and for graph cut family  $\mathcal{S} = \mathcal{T}_{G,\rho}$  with different bounds  $\rho$  on the cut-size.

## A. Calculating $\mu_{\text{detect}}$

$\mu_{\text{detect}}$  is the smallest mean  $\mu$  such that the GLR test asymptotically solves the ASD Detection Problem with the probability of a type 1 or type 2 error going to 0 as  $n \rightarrow \infty$  (Sharpnack et al., 2013a). We empirically determine  $\mu_{\text{detect}}$  by finding the smallest mean  $\mu$  such that the Type I and Type II errors of the GLR test statistic  $\hat{t}_S$  (Equation (2) in the main text) are both less than 0.01.

## B. Additional Experiments

### B.1. F-measure

Although Conjecture 1 is about the Bias( $|\hat{A}_S|/n$ ) of the MLE  $\hat{A}_S$ , we also observe that larger Bias( $|\hat{A}_S|/n$ ) reduces the F-measure between the anomaly  $A$  and the MLE  $\hat{A}_S$ . Using the data described in Section 3.1 in the main text, we find a noticeable difference in F-measure between anomaly families where  $|\check{S}(A)|$  is exponential — the connected family  $\mathcal{C}_G$  and the unstructured family  $\mathcal{P}_n$  — and anomaly families where  $|\check{S}(A)|$  is sub-exponential — the interval family  $\mathcal{I}_n$  and the submatrix family  $\mathcal{M}_N$  (Figure S1 A).

In contrast, our GMM-based estimator  $\hat{A}_{\text{GMM}}$  has a much smaller difference in the F-measure for anomaly families where  $|\check{S}(A)|$  is exponential versus anomaly families where  $|\check{S}(A)|$  is sub-exponential (Figure S1 B). This result is consistent with the reduced bias of the GMM-based estimator  $\hat{A}_{\text{GMM}}$  (Figure 2C, main text). Interestingly, even for our reduced bias estimator, we still observe a mild difference in F-measure between the families with exponential  $|\check{S}(A)|$  versus the families with sub-exponential  $|\check{S}(A)|$ .

### B.2. Graph Cut Family

We examine the Bias( $|\hat{A}_{\mathcal{T}_{G,\rho}}|/n$ ) of the size of the MLE  $\hat{A}_{\mathcal{T}_{G,\rho}}$  for the graph cut family  $\mathcal{T}_{G,\rho}$ , where  $G$  is a  $\sqrt{n} \times \sqrt{n}$  lattice graph, for different values of the bound  $\rho$  on the cut-size. For each value of  $\rho$ , we select an anomaly  $A \in \mathcal{T}_{G,\rho}$  with size  $|A| = 0.05n$  uniformly at random from  $\mathcal{T}_{G,\rho}$ . (Note that the cut-size of  $A$  is not fixed, as we select  $A$  uniformly at random from the set  $\mathcal{T}_{G,\rho}$  of all subgraphs of  $G$  with cut-size less than  $\rho$ .) We then draw a sample  $\mathbf{X} = (X_1, \dots, X_n) \sim \text{ASD}_{\mathcal{T}_{G,\rho}}(A, \mu)$  with  $n = 900$  observations and compute the MLE  $\hat{A}_{\mathcal{T}_{G,\rho}}$ . We repeat for 50 samples to estimate Bias( $|\hat{A}_{\mathcal{T}_{G,\rho}}|/n$ ).

While the graph cut anomaly family is often studied in the network anomaly literature (Sharpnack et al., 2013b;a; Sharp-

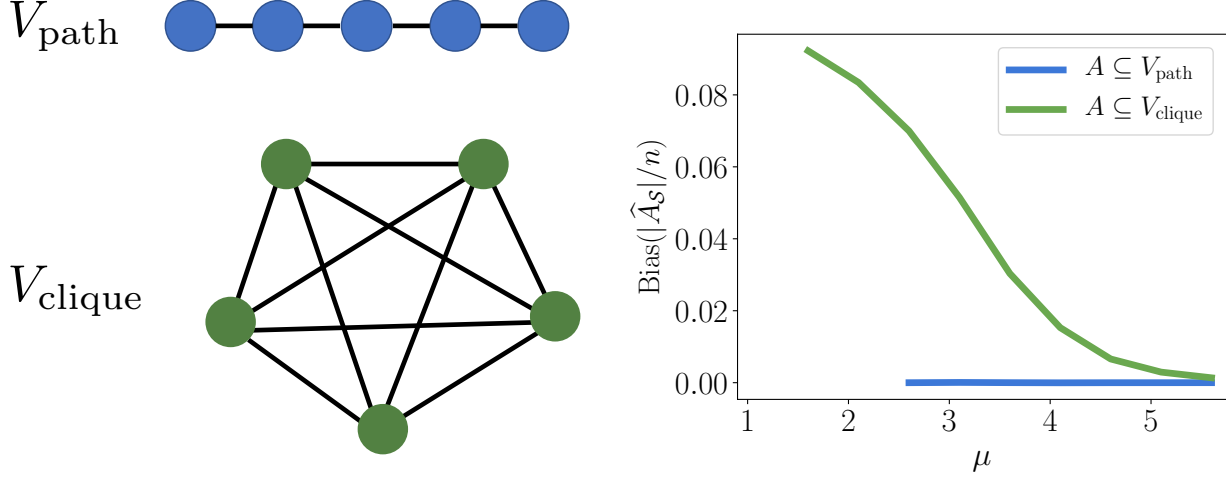

Figure S2: **Left:** Graph  $G = (V, E)$  with two disjoint connected components:  $V_{\text{path}}$ , a path graph, and  $V_{\text{clique}}$ , a clique graph, with  $|V_{\text{path}}| = |V_{\text{clique}}| = \frac{n}{2}$ . **Right:**  $\text{Bias}(|\hat{A}_{\mathcal{S}}|/n)$  versus mean  $\mu$  for the connected anomaly family  $\mathcal{S} = \mathcal{C}_G$  with  $n = |V| = 500$  vertices and an anomaly  $A$  with size  $|A| = 0.05n$ , for means  $\mu \geq \mu_{\text{detect}}$ . The blue line corresponds to an anomaly  $A \subseteq V_{\text{path}}$  and the green line corresponds to an anomaly  $A \subseteq V_{\text{clique}}$ . This experiment suggests that the  $\text{Bias}(|\hat{A}_{\mathcal{S}}|/n)$  is determined by the  $|\check{\mathcal{S}}(A)|$ , rather than  $|\mathcal{S}|$ , consistent with Conjecture 1.

nack, 2013), the cut-size bound  $\rho$  is typically left unspecified. When  $\rho$  is constant  $|\check{\mathcal{S}}(A)|$  is polynomial in  $n$ , but when  $\rho$  is close to the number of edges in  $G$  then  $|\check{\mathcal{S}}(A)|$  is exponential in  $n$  (Nagamochi et al., 1994). So by Conjecture 1 we expect the bias of the MLE  $\hat{A}_{\mathcal{T}_{G,\rho}}$  to depend on  $\rho$ . Indeed, we observe that the  $\text{Bias}(|\hat{A}_{\mathcal{T}_{G,\rho}}|/n)$  of the MLE is small when  $\rho$  is small and the  $\text{Bias}(|\hat{A}_{\mathcal{T}_{G,\rho}}|/n)$  of the MLE is large when  $\rho$  is large (Figure S1 C), which is consistent with Conjecture 1. Our results demonstrate that careful attention to the cut-size bound  $\rho$  is required when the MLE  $\hat{A}_{\mathcal{T}_{G,\rho}}$  is used for anomaly estimation.

For the same data, we find that our GMM estimator  $\hat{A}_{\text{GMM}}$  has small bias regardless of the cut-size bound  $\rho$  (Figure S1 D). This is consistent with Corollary 1, and demonstrates that our GMM estimator  $\hat{A}_{\text{GMM}}$  is a less biased estimator than the MLE  $\hat{A}_{\mathcal{T}_{G,\rho}}$  regardless of the cut-size bound  $\rho$ .

### B.3. Dependence of $\text{Bias}(|\hat{A}_{\mathcal{S}}|/n)$ on $|\check{\mathcal{S}}(A)|$ versus $|\mathcal{S}|$

In this section, we construct an anomaly family  $\mathcal{S}$  where  $|\mathcal{S}|$  is exponential, but  $|\check{\mathcal{S}}(A)|$  is exponential for some anomalies  $A$  and sub-exponential for others. We then use this anomaly family  $\mathcal{S}$  to provide evidence that  $\text{Bias}(|\hat{A}_{\mathcal{S}}|/n)$  depends on the number  $|\check{\mathcal{S}}(A)|$  of subsets in  $\mathcal{S}$  that contain the anomaly  $A$ , rather than the size  $|\mathcal{S}|$  of the anomaly family.

Let  $G = (V, E)$  be a graph whose vertices  $V = V_{\text{path}} \cup V_{\text{clique}}$  can be partitioned into two disjoint connected components:  $V_{\text{path}}$ , a path graph, and  $V_{\text{clique}}$ , a clique (Figure S2, left). (Note that the path graph  $V_{\text{path}}$  and the clique  $V_{\text{clique}}$  are disjoint, unlike the graph from Figure 2.) Both the path graph  $V_{\text{path}}$  and the clique  $V_{\text{clique}}$  have size  $|V_{\text{path}}| = |V_{\text{clique}}| = \frac{n}{2}$ , where  $n = 900$ .

Let  $\mathcal{S} = \mathcal{C}_G$  be the connected family for graph  $G$ , and let  $A \in \mathcal{C}_G$  be a set of size  $|A| = 0.05n$ . The size  $|\mathcal{S}|$  of the anomaly family  $\mathcal{S}$  is exponential in  $n$ , as  $|\mathcal{S}| = O(2^{\frac{n}{2}})$ . However,  $|\check{\mathcal{S}}(A)|$  depends on the anomaly  $A$ : if the anomaly  $A \subseteq V_{\text{path}}$  is in the path graph component, then  $|\check{\mathcal{S}}(A)| = O(n^2)$  is sub-exponential in  $n$ . On the other hand, if  $A \subseteq V_{\text{clique}}$  is in the clique graph component, then  $|\check{\mathcal{S}}(A)| = O(2^{0.45n})$  is exponential in  $n$ .

Empirically, we observe that if  $\mu \geq \mu_{\text{detect}}$ , then  $\text{Bias}(|\hat{A}_{\mathcal{S}}|/n) \approx 0$  if  $A \subseteq V_{\text{path}}$  and  $\text{Bias}(|\hat{A}_{\mathcal{S}}|/n) > 0$  if  $A \subseteq V_{\text{clique}}$  (Figure S2, right). This finding is consistent with Conjecture 1 and demonstrates the dependence of  $\text{Bias}(|\hat{A}_{\mathcal{S}}|/n)$  on  $|\check{\mathcal{S}}(A)|$  rather than  $|\mathcal{S}|$ .

#### B.4. Highway Traffic Data with Edge-Dense Family

We compare our estimator  $\hat{A}_{\text{GMM}}$  and the MLE  $\hat{A}_{\mathcal{S}}$  on a real-world highway traffic dataset. This dataset consists of a highway traffic network  $G = (V, E)$  in Los Angeles County, CA with  $|V| = 1868$  vertices and  $|E| = 1993$  edges. The vertices  $V$  are sensors that record the speed of cars passing and the edges  $E$  connect adjacent sensors. The observations  $\mathbf{X} = (X_v)_{v \in V}$  are  $p$ -values (where sensors that record higher average speeds have lower  $p$ -values) that are transformed to Gaussians using the method in Reyna et al. (2020).

For the edge-dense family  $\mathcal{E}_{G,\delta}$  with edge density  $\delta = 0.7$ , we find that our GMM-based estimator  $\hat{A}_{\text{GMM}}$  is much smaller than the MLE  $\hat{A}_{\mathcal{E}_{G,\delta}}$  ( $|\hat{A}_{\text{GMM}}| = 10$  versus  $|\hat{A}_{\mathcal{E}_{G,\delta}}| = 600$ ) but with higher average score (4.4 for our estimator versus 0.4 for the MLE). While there is no ground-truth anomaly in this dataset, our results show that our estimator  $\hat{A}_{\text{GMM}}$  yields a smaller anomaly but with higher average values than the MLE  $\hat{A}_{\mathcal{E}_{G,\delta}}$ , which also suggests that the MLE  $\hat{A}_{\mathcal{E}_{G,\delta}}$  for the edge-dense family  $\mathcal{E}_{G,\delta}$  is biased.

#### B.5. Additional Details for NYC Breast Cancer

In the NYC breast cancer incidence data (Boscoe et al., 2016), we are given observed disease counts  $\mathbf{C} = \{C_1, \dots, C_n\}$  and expected disease counts  $\mathbf{B} = \{B_1, \dots, B_n\}$  for each census block  $i \in [n]$ . As is standard in the disease surveillance and spatial scan statistic literature, (Kulldorff, 1997; Glaz & Naus, 2010; Neill, 2009; 2012), we model the observed counts  $\mathbf{C}$  as being distributed as

$$C_i \sim \begin{cases} \text{Pois}(q_{\text{in}} B_i), & \text{if } i \in A, \\ \text{Pois}(B_i), & \text{otherwise,} \end{cases} \quad (1)$$

where  $A \in \mathcal{S}$  is the anomaly,  $\mathcal{S}$  is the anomaly family, and  $q_{\text{in}}$  is the *relative risk* of census blocks  $i \in A$  in the anomaly  $A$ .

The MLE  $\hat{A}_{\mathcal{S}}$  for the anomaly  $A$  given the observed counts  $\mathbf{C}$  and the expected counts  $\mathbf{B}$  — also known as the expectation-based Poisson scan statistic in the spatial scan statistic literature (Neill, 2009) — is given by

$$\hat{A}_{\mathcal{S}} = \underset{A \in \mathcal{S}}{\text{argmax}} \left[ \sum_{i \in A} (B_i) + \left( \sum_{i \in A} C_i \right) \cdot \left( -1 + \log \sum_{i \in A} C_i - \log \sum_{i \in A} B_i \right) \right]. \quad (2)$$

We adapt our estimator to the disease count model in Equation (1) by using the EM algorithm to fit the observed counts  $\mathbf{C}$  to the Poisson mixture  $C_i \sim \alpha \cdot \text{Pois}(q_{\text{in}} B_i) + (1 - \alpha) \cdot \text{Pois}(B_i)$ . The other components of our estimator are unchanged: we use this fit to compute the responsibilities  $\hat{r}_i = P(i \in A \mid C_i, B_i)$  for each census block  $i \in [n]$ , and then estimate the anomaly using Equation (6) in the main text.

#### C. Wasserstein Distance between GMM and Unstructured ASD

Let  $\mathbf{X} = (X_1, \dots, X_n)$  with  $X_i \stackrel{\text{i.i.d.}}{\sim} \text{GMM}(\mu, \alpha)$  distributed according to the GMM and let  $\mathbf{Y} = (Y_1, \dots, Y_n) \sim \text{ASD}_{\mathcal{P}_n}(A, \mu)$  be distributed according to the unstructured ASD, with  $\alpha = |A|/n$ . We empirically observe that  $d_W\left(\frac{1}{n} \sum_{i=1}^n 1_{X_i}, \frac{1}{n} \sum_{i=1}^n 1_{Y_i}\right) = O(n^{-0.5})$ , where  $d_W$  is the 1-Wasserstein distance, also known as the earth mover's distance (Figure S3). We note that our empirical observation matches the result that the Wasserstein distance between the normal distribution  $N(\mu, \sigma)$  and the empirical distribution of  $n$  samples from  $N(\mu, \sigma)$  is also  $O(n^{-0.5})$  (Rippl et al., 2016; Weed & Bach, 2019).

#### D. Regularized MLE for Submatrix ASD

For the submatrix family  $\mathcal{M}_N$ , Liu & Arias-Castro (2019) show that a regularized version of the MLE is asymptotically unbiased. Specifically, for a submatrix  $M \in \mathbb{R}^{p \times q}$  of a matrix  $N \in \mathbb{R}^{m \times m}$ , they define the regularized scan statistic function  $\Gamma_{\text{R}}(M) = \Gamma(M) - \sqrt{2 \log \left( m^2 \binom{m}{p} \binom{m}{q} \right)}$  and the regularized MLE  $\hat{A}_{\text{R}} = \underset{M \in \mathcal{M}_N}{\text{argmax}} \Gamma_{\text{R}}(M)$ . Liu & Arias-Castro (2019) then show that  $\hat{A}_{\text{R}}$  is asymptotically unbiased.

However, our proof of Theorem 1 shows that the MLE  $\hat{A}_{\mathcal{M}_N}$  for the submatrix ASD, which does not use the above regularization, is also asymptotically unbiased. Thus, the regularization is not required. Empirically, we find that that the

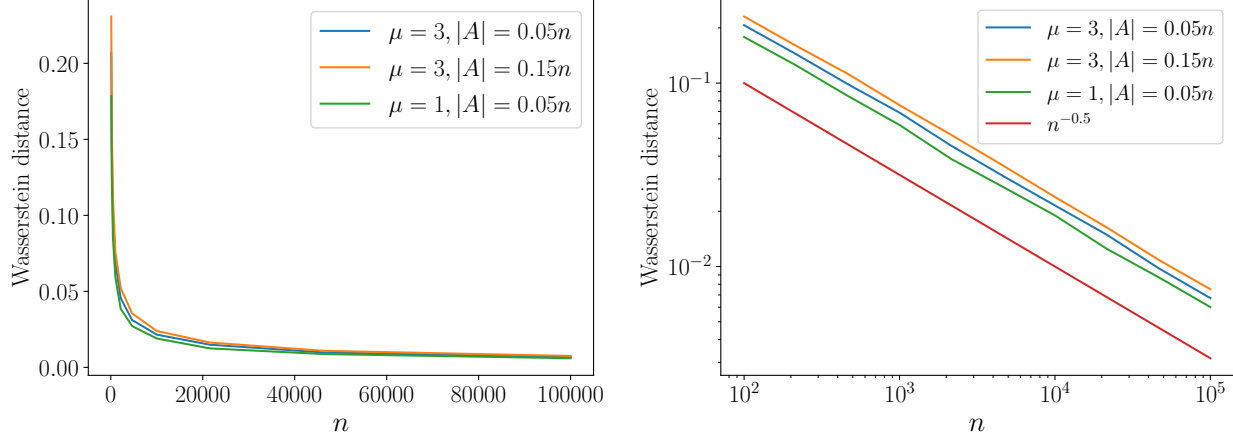

Figure S3: 1-Wasserstein distance between the GMM distribution and the unstructured ASD distribution.  $\mathbf{X} = (X_1, \dots, X_n) \stackrel{\text{i.i.d.}}{\sim} \text{GMM}(\mu, \alpha)$  is distributed according to the GMM and  $\mathbf{Y} = (Y_1, \dots, Y_n) \sim \text{ASD}_{\mathcal{P}_n}(A, \mu)$  is distributed according to the unstructured ASD, with  $\alpha = |A|/n$ . **Left:**  $d_W(\frac{1}{n} \sum_{i=1}^n 1_{X_i}, \frac{1}{n} \sum_{i=1}^n 1_{Y_i})$ , the 1-Wasserstein distance between the empirical distributions of the GMM and unstructured ASD, versus the number  $n$  of observations for various values of  $\mu$  and  $|A|/n$ . **Right:** 1-Wasserstein distance on log-log scale. We observe that the 1-Wasserstein distance  $d_W(\frac{1}{n} \sum_{i=1}^n 1_{X_i}, \frac{1}{n} \sum_{i=1}^n 1_{Y_i})$  is  $O(n^{-0.5})$ , as each line is parallel to  $n^{-0.5}$  in the log-log plot.

MLE  $\hat{A}_{\mathcal{M}_N}$  and the regularized MLE  $\hat{A}_R$  have similar bias and similar  $F$ -measure to the anomaly (Figure S4), suggesting that the regularization proposed by (Liu & Arias-Castro, 2019) is not necessary to reduce bias or increase performance in anomaly estimation.

## E. Approximating the GMM Estimator for the Submatrix Family and the Connected Family

For the submatrix family  $\mathcal{S} = \mathcal{M}_N$  and the connected family  $\mathcal{S} = \mathcal{C}_G$ , our GMM estimator

$$\hat{A}_{\text{GMM}} = \underset{\substack{S \in \mathcal{S} \\ |S| - \hat{\alpha}_{\text{GMM}} \leq \sqrt{\frac{\log n}{n}}}}{\text{argmax}} \left( \sum_{i \in S} \hat{r}_i \right) \quad (3)$$

can be inefficient to compute because of the constraint on the size  $|S|$  of the subset  $S$ . In our experiments, we relax this constraint by computing the following approximation  $\tilde{A}_{\text{GMM}}$  of our GMM estimator:

$$\tilde{A}_{\text{GMM}} = \underset{S \in \mathcal{S}}{\text{argmax}} \sum_{i \in S} (\hat{r}_i - \tau). \quad (4)$$

Here,  $\tau > 0$  is a positive number that we use to “shift” the estimated responsibilities  $\hat{r}_i$  to  $\hat{r}_i - \tau$ . We select  $\tau > 0$  so that the number  $T$  of positive “shifted” responsibilities  $\hat{r}_i - \tau$  satisfies  $|T - \hat{\alpha}_{\text{GMM}}| \leq \sqrt{\frac{\log n}{n}}$ . That is,  $\tau$  is chosen so that  $\{i : \hat{r}_i - \tau > 0\} = T$ , where  $T$  satisfies  $|T - \hat{\alpha}_{\text{GMM}}n| \leq \sqrt{\frac{\log n}{n}}$ . Because the number of positive shifted responsibilities is  $T$ , we expect our approximate estimator  $\tilde{A}_{\text{GMM}}$  to have size  $|\tilde{A}_{\text{GMM}}| \approx T \approx \hat{\alpha}_{\text{GMM}}n$ .

## F. Proof of Theorem 1

### F.1. Preliminary Lemmas

We first prove the following technical lemmas.

**Lemma 1.** Let  $\{A_n\}_{n=1,2,\dots}$  and  $\{B_n\}_{n=1,2,\dots}$  be two sequences of events in the same probability space. Suppose  $\lim_{n \rightarrow \infty} P(A_n) = 1$  and  $\lim_{n \rightarrow \infty} P(B_n) = 1$ . Then  $\lim_{n \rightarrow \infty} P(A_n \cap B_n) = 1$ .

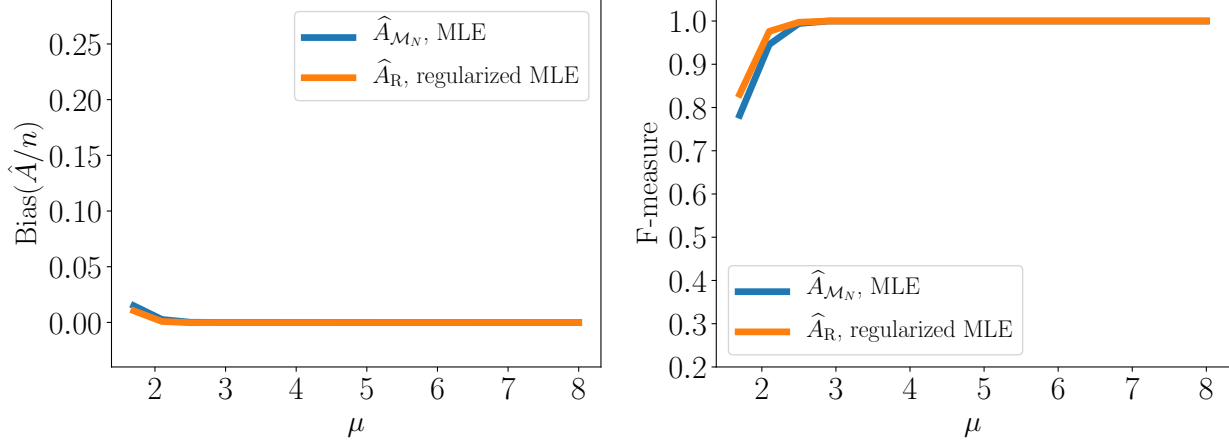

Figure S4:  $\mathbf{X} \sim \text{ASD}_{\mathcal{M}_N}(A, \mu)$  is distributed according to the submatrix ASD, where  $N \in \mathbb{R}^{30 \times 30}$  is a  $30 \times 30$  matrix. **Left:** Bias( $|\hat{A}_{\mathcal{M}_N}|/n$ ) and Bias( $|\hat{A}_R|/n$ ) versus  $\mu$  for means  $\mu \geq \mu_{\text{detect}}$ . **Right:** F-measure of  $\hat{A}_{\mathcal{M}_N}$  and  $\hat{A}_R$  versus  $\mu$  for means  $\mu \geq \mu_{\text{detect}}$ .

*Proof.* Let  $p_n = P(A_n)$  and  $q_n = P(B_n)$ . Then

$$P(A_n \cap B_n) = P(A_n) + P(B_n) - P(A_n \cup B_n) = p_n + q_n - P(A_n \cup B_n) \geq p_n + q_n - 1, \quad (5)$$

where in the last inequality we use that  $P(A_n \cup B_n) \leq 1$ . Thus,

$$\lim_{n \rightarrow \infty} P(A_n \cap B_n) \geq \lim_{n \rightarrow \infty} (p_n + q_n - 1) = \left( \lim_{n \rightarrow \infty} p_n \right) + \left( \lim_{n \rightarrow \infty} q_n \right) - 1 = 1.$$

Since  $\lim_{n \rightarrow \infty} P(A_n \cap B_n) \leq 1$  by definition, it follows that  $\lim_{n \rightarrow \infty} P(A_n \cap B_n) = 1$   $\square$

**Lemma 2.** Let  $X_1, X_2, \dots$  be a sequence of random variables with  $X_n < 1$  for all  $n$ . If  $\lim_{n \rightarrow \infty} P(X_n > C) = 0$  for some  $C > 0$ , then  $E[X_n] < 2C$  for sufficiently large  $n$ .

*Proof.* We have two cases depending on the value of  $C$ . First, suppose  $C \geq 1$ . Then  $X_n < 1 < C$  for all  $n$ , and it follows that  $E[X_n] < C < 2C$ .

Next, suppose  $C \in (0, 1)$ . Let  $n$  be sufficiently large so that  $P(X_n > C) < \frac{C}{1-C}$ . Then

$$E[X_n] \leq C \cdot P(X_n \leq C) + 1 \cdot P(X_n > C) \leq C \cdot \left(1 - \frac{C}{1-C}\right) + \frac{C}{1-C} = 2C. \quad \square$$

**Lemma 3.** Let  $X_n \sim N(\mu_n, \sigma_n)$ , with  $\mu_n, \sigma_n \rightarrow \infty$  as  $n \rightarrow \infty$ . Then

$$\lim_{n \rightarrow \infty} P\left(\mu_n - \sqrt{2\sigma_n \log n} \leq X_n \leq \mu_n + \sqrt{2\sigma_n \log n}\right) = 1. \quad (6)$$

*Proof.* We have

$$\begin{aligned} P(X_n > \mu_n + \sqrt{2\sigma_n \log n}) &= P(Z > \sqrt{2 \log n}), \text{ where } Z \sim N(0, 1), \\ &\leq \frac{1}{\sqrt{2\pi}} \cdot \frac{1}{\sqrt{2 \log n}} \cdot \frac{1}{n} = O\left(\frac{1}{n}\right), \end{aligned} \quad (7)$$

where in the last inequality we use the standard bound  $P(Z \geq x) \leq \frac{1}{\sqrt{2\pi}} \frac{1}{x} e^{-x^2/2}$ . By symmetry, we have

$$P(X_n < \mu_n - \sqrt{2\sigma_n \log n}) \leq O\left(\frac{1}{n}\right) \quad (8)$$

Thus,

$$P\left(\mu_n - \sqrt{2\sigma_n \log n} \leq X_n \leq \mu_n + \sqrt{2\sigma_n \log n}\right) > 1 - O\left(\frac{1}{n}\right).$$

Taking the limit as  $n \rightarrow \infty$  proves the result.  $\square$

**Lemma 4.** Suppose  $X_v \stackrel{i.i.d.}{\sim} N(0, 1)$  for  $v = 1, \dots, n$ . Let  $\mathcal{S} \subseteq \mathcal{P}_n$  be a family of subsets of  $[n]$  with size  $|\mathcal{S}| = \Omega(n)$ . For any  $k \in [n]$  define  $\mathcal{S}_k = \{B \in \mathcal{S} : |B| = k\}$  and  $Y_k = \max_{B \in \mathcal{S}_k} \left( \sum_{v \in B} X_v \right)$ . Then,

$$\lim_{n \rightarrow \infty} P\left(Y_k \leq \sqrt{2n \log |\mathcal{S}|} \text{ for all } k = 1, \dots, \frac{n}{2}\right) = 1 \quad (9)$$

*Proof.* Let  $t = \sqrt{2n \log |\mathcal{S}|}$  and let  $\Phi$  be the CDF of the standard normal distribution. Fix  $k \in \{1, \dots, \frac{n}{2}\}$ . We have

$$\begin{aligned} P(Y_k > t) &= P\left(\max_{B \in \mathcal{S}_k} \sum_{v \in B} X_v > t\right) \\ &\leq \sum_{B \in \mathcal{S}_k} P\left(\sum_{v \in B} X_v > t\right) \\ &= |\mathcal{S}_k| \cdot (1 - \Phi(t/\sqrt{k})) \\ &\leq |\mathcal{S}| \cdot (1 - \Phi(t/\sqrt{k})). \end{aligned} \quad (10)$$

where the first inequality uses a union bound and the second equality uses that  $\sum_{v \in B} X_v \sim N(0, k)$ . Plugging in the standard bound  $1 - \Phi(x) \leq \frac{1}{\sqrt{2\pi}} \frac{1}{x} e^{-x^2/2}$  gives us:

$$\begin{aligned} P\left(\max_{B \in \mathcal{S}_k} \sum_{v \in B} X_v > t\right) &\leq |\mathcal{S}| \cdot (1 - \Phi(t/\sqrt{k})) \\ &\leq |\mathcal{S}| \cdot \frac{1}{\sqrt{2\pi}} \frac{\sqrt{k}}{t} e^{-t^2/2k} \\ &= |\mathcal{S}| \cdot \frac{1}{\sqrt{2\pi}} \cdot \sqrt{\frac{k}{2n \cdot \log |\mathcal{S}|}} \cdot e^{-\frac{n \cdot \log |\mathcal{S}|}{k}} \\ &= \left(\sqrt{\frac{k}{4\pi n}}\right) \cdot \frac{1}{\sqrt{\log |\mathcal{S}|}} \cdot |\mathcal{S}|^{1-\frac{n}{k}} \\ &\leq \left(\sqrt{\frac{1}{4\pi}}\right) \cdot \frac{1}{|\mathcal{S}| \cdot \sqrt{\log |\mathcal{S}|}}, \text{ since } k \leq \frac{n}{2}. \end{aligned} \quad (11)$$

Taking a union bound over all  $k = 1, \dots, \frac{n}{2}$  gives us

$$\begin{aligned} P\left(\max_{B \in \mathcal{S}_k} \sum_{v \in B} X_v > t \text{ for any } k = 1, \dots, \frac{n}{2}\right) &\leq \sum_{k=1}^{n/2} P\left(\max_{B \in \mathcal{S}_k} \sum_{v \in B} X_v > t\right) \\ &\leq \frac{n}{2} \cdot \left(\sqrt{\frac{1}{4\pi}}\right) \cdot \frac{1}{|\mathcal{S}| \cdot \sqrt{\log |\mathcal{S}|}}, \text{ by Equation (11),} \\ &= \left(\sqrt{\frac{1}{16\pi}}\right) \cdot \frac{n}{|\mathcal{S}| \cdot \sqrt{\log |\mathcal{S}|}} \\ &= O\left(\frac{1}{\sqrt{\log n}}\right) \text{ as } |\mathcal{S}| = \Omega(n). \end{aligned} \quad (12)$$

It follows that for sufficiently large  $n$ , there exists a constant  $C > 0$  such that

$$P\left(\max_{B \in \mathcal{S}_k} \sum_{v \in B} X_v > t \text{ for any } k = 1, \dots, \frac{n}{2}\right) \leq \frac{C}{\sqrt{\log n}}, \quad (13)$$

so that

$$\begin{aligned} \lim_{n \rightarrow \infty} P\left(Y_k \leq \sqrt{2n \log |\mathcal{S}|} \text{ for all } k = 1, \dots, \frac{n}{2}\right) &= 1 - \lim_{n \rightarrow \infty} P\left(Y_k > \sqrt{2n \log |\mathcal{S}|} \text{ for any } k = 1, \dots, \frac{n}{2}\right) \\ &\geq 1 - \lim_{n \rightarrow \infty} \left(\frac{C}{\sqrt{\log n}}\right), \text{ by Equation (13),} \\ &= 1, \end{aligned} \quad (14)$$

proving the result.  $\square$

**Lemma 5.** Let  $\mathbf{X} \sim \text{ASD}_{\mathcal{S}}(A, \mu)$  where  $|A| = \alpha n$  for  $0 < \alpha < 0.5$ . Then  $\lim_{n \rightarrow \infty} P(|\hat{A}_{\mathcal{S}}| \leq 0.5n) = 1$ .

*Proof.* Let  $S \in \mathcal{S}$  be a set with size  $|S| > 0.5n$ . To prove the claim, it suffices to show that

$$\frac{1}{\sqrt{|A|}} \sum_{v \in A} X_v > \frac{1}{\sqrt{|S|}} \sum_{v \in S} X_v. \quad (15)$$

with high probability.

Note that  $\frac{1}{\sqrt{|A|}} > \frac{1}{\sqrt{\alpha n}}$  and  $\frac{1}{\sqrt{|S|}} \leq \frac{1}{\sqrt{0.5n}}$ . Thus, to prove (15) it is sufficient to prove that

$$\frac{1}{\sqrt{0.25n}} \sum_{v \in A} X_v > \frac{1}{\sqrt{0.5n}} \sum_{v \in S} X_v \iff \sum_{v \in A} X_v > (\sqrt{2\alpha}) \sum_{v \in S} X_v. \quad (16)$$

with high probability.

By independence of the  $X_v$ , we have that  $\sum_{v \in A} X_v \sim N(\mu\alpha n, \alpha n)$ , so by Lemma 3 it follows that  $\sum_{v \in A} X_v > \mu\alpha n - \sqrt{2\alpha n \log n}$  with high probability. Similarly, we have that  $\sum_{v \in S} X_v \sim N(M, \beta n)$  where  $M \leq \mu\alpha n$  (as there are at most  $|A| = \alpha n$  terms in the sum  $\sum_{v \in S} X_v$  with mean  $\mu$ , and the other terms have mean 0). Thus, by Lemma 3, we also have  $\sum_{v \in S} X_v < \mu\alpha n + \sqrt{2|S| \log n}$  with high probability. Putting together the lower bound on  $\sum_{v \in A} X_v$  and the upper bound on  $\sum_{v \in S} X_v$ , (16) can be reduced to

$$\mu\alpha n - \sqrt{2\alpha n \log n} > (\sqrt{2\alpha}) (\mu\alpha n + \sqrt{2|S| \log n}) \iff (1 - \sqrt{2\alpha}) \mu\alpha n > \sqrt{n \log n} \left( \sqrt{\frac{|S|}{\alpha n}} + \sqrt{2\alpha} \right). \quad (17)$$

Because  $\alpha < 0.5$ , the LHS is  $\Theta(n)$ . Since the RHS is  $o(n)$ , then (17) holds with high probability. Thus, (15) also holds with high probability, and the result follows.  $\square$

## F.2. Main Lemmas

**Lemma 6.** Let  $\mathbf{X} \sim \text{ASD}_{\mathcal{S}}(A, \mu)$  where  $|\mathcal{S}| = \Omega(n)$  and  $|A| = \alpha n$  with  $0 < \alpha < 0.5$ . Suppose  $\lim_{n \rightarrow \infty} P(A \subseteq \hat{A}_{\mathcal{S}}) = 1$ . Then for sufficiently large  $n$ , we have

$$\text{Bias} \left( \frac{|\hat{A}_{\mathcal{S}}|}{n} \right) \leq 2\alpha \left( \left( \frac{\mu\alpha n + \sqrt{2n \log |\check{\mathcal{S}}(A)|} + \sqrt{2\alpha n \log n}}{\mu\alpha n - \sqrt{2\alpha n \log n}} \right)^2 - 1 \right) + o(1). \quad (18)$$

*Proof.* We will first derive the  $o(1)$  term in Equation (18). Let  $X_S = \sum_{v \in S} X_v$ , and define the following events:

$$D_n = \left[ |\hat{A}_{\mathcal{S}}| \leq \frac{n}{2} \right]$$

$$\begin{aligned}
 E_n &= [A \subseteq \hat{A}_S], \\
 F_n &= \left[ \mu\alpha n - \sqrt{2\alpha n \log n} \leq X_A \leq \mu\alpha n + \sqrt{2\alpha n \log n} \right], \\
 G_n &= \left[ \max_{\substack{B \in \check{S}(A) \\ |B| \leq \frac{n}{2}}} X_{B \setminus A} \leq \sqrt{2n \log |\check{S}(A)|} \right].
 \end{aligned}$$

Let  $H_n = D_n \cap E_n \cap F_n \cap G_n$ . We claim that  $\lim_{n \rightarrow \infty} P(H_n) = 1$ .

To prove this claim, first note that  $\lim_{n \rightarrow \infty} P(D_n) = 1$  by Lemma 5 and  $\lim_{n \rightarrow \infty} P(E_n) = 1$  by assumption. Moreover, because  $X_A \sim N(\mu\alpha n, \alpha n)$ , it follows from Lemma 3 that  $\lim_{n \rightarrow \infty} P(F_n) = 1$ . Finally, by applying Lemma 4 with the anomaly family  $\check{S}(A)$ , we have that  $\lim_{n \rightarrow \infty} P(G_n) = 1$ . Thus, by a repeated application of Lemma 1, we have  $\lim_{n \rightarrow \infty} P(H_n) = \lim_{n \rightarrow \infty} P(D_n \cap E_n \cap F_n \cap G_n) = 1$ .

Now define  $p_n = P(H_n)$ . Then, we have

$$\begin{aligned}
 \text{Bias} \left( \frac{|\hat{A}_S|}{n} \right) &= p_n \cdot \text{Bias} \left( \frac{|\hat{A}_S|}{n} \middle| H_n \right) + (1 - p_n) \cdot \text{Bias} \left( \frac{|\hat{A}_S|}{n} \middle| H_n^c \right) \\
 &\leq \text{Bias} \left( \frac{|\hat{A}_S|}{n} \middle| H_n \right) + (1 - p_n) \\
 &= \text{Bias} \left( \frac{|\hat{A}_S|}{n} \middle| H_n \right) + o(1),
 \end{aligned} \tag{19}$$

where in the second line we use that  $p_n \leq 1$  and  $\text{Bias} \left( \frac{|\hat{A}_S|}{n} \middle| H_n^c \right) \leq 1$ , and in the third line we use that  $\lim_{n \rightarrow \infty} P(H_n) = 1$ .

To complete the proof, we will bound  $\text{Bias} \left( \frac{|\hat{A}_S|}{n} \middle| H_n \right)$ . Since the bias term conditions on  $H_n = D_n \cap E_n \cap F_n \cap G_n$ , for the rest of the proof we will assume that the events  $D_n$ ,  $E_n$ ,  $F_n$ , and  $G_n$  hold.

Since  $E_n$  holds, we have that

$$\begin{aligned}
 \Gamma(A) &= \frac{1}{\sqrt{|A|}} \sum_{v \in A} X_v = \frac{1}{\sqrt{\alpha n}} X_A \\
 \Gamma(\hat{A}_S) &= \frac{1}{\sqrt{|\hat{A}_S|}} \sum_{v \in \hat{A}_S} X_v = \frac{1}{\sqrt{|\hat{A}_S|}} (X_A + X_{\hat{A}_S \setminus A}),
 \end{aligned}$$

We will find lower and upper bounds for  $X_{\hat{A}_S \setminus A}$  in terms of  $|\hat{A}_S|$ , and use those bounds to derive (18).

We start by finding a lower bound for  $X_{\hat{A}_S \setminus A}$ . Since  $F_n$  holds, we have:

$$\mu\alpha n - \sqrt{2\alpha n \log n} \leq X_A \leq \mu\alpha n + \sqrt{2\alpha n \log n}. \tag{20}$$

Combining (20) and the fact that  $\Gamma(A) \leq \Gamma(\hat{A}_S)$  yields

$$\frac{1}{\sqrt{\alpha n}} (\mu\alpha n - \sqrt{2\alpha n \log n}) \leq \Gamma(A) \leq \Gamma(\hat{A}_S) \leq \frac{1}{\sqrt{|\hat{A}_S|}} (\mu\alpha n + \sqrt{2\alpha n \log n} + X_{\hat{A}_S \setminus A}). \tag{21}$$

By assumption,  $\hat{A}_S \setminus A \neq \emptyset$ . Thus, solving for  $X_{\hat{A}_S \setminus A}$  gives us a lower bound on  $X_{\hat{A}_S \setminus A}$ :

$$X_{\hat{A}_S \setminus A} \geq \sqrt{\frac{|\hat{A}_S|}{\alpha n}} (\mu\alpha n - \sqrt{2\alpha n \log n}) - \mu\alpha n - \sqrt{2\alpha n \log n}. \tag{22}$$



Next, we find an upper bound for  $X_{\hat{A}_S \setminus A}$ . Since  $D_n$  holds, we have  $|\hat{A}_S| \leq \frac{n}{2}$ . Since  $G_n$  also holds, we have

$$X_{\hat{A}_S \setminus A} \leq \max_{\substack{B \in \check{\mathcal{S}}(A) \\ |B| \leq \frac{n}{2}}} X_{B \setminus A} \leq \sqrt{2n \log |\check{\mathcal{S}}(A)|}. \quad (23)$$

Combining the lower bound from (22) and the upper bound from (23) yields

$$\sqrt{\frac{|\hat{A}_S|}{\alpha n}} \left( \mu \alpha n - \sqrt{2\alpha n \log n} \right) - \mu \alpha n - \sqrt{2\alpha n \log n} \leq X_{\hat{A}_S \setminus A} \leq \sqrt{2n \log |\check{\mathcal{S}}(A)|} \quad (24)$$

Thus, the LHS of (24) is less than the RHS of (24), i.e.

$$\sqrt{\frac{|\hat{A}_S|}{\alpha n}} \left( \mu \alpha n - \sqrt{2\alpha n \log n} \right) - \mu \alpha n - \sqrt{2\alpha n \log n} \leq \sqrt{2n \log |\check{\mathcal{S}}(A)|}. \quad (25)$$

Rearranging (25) yields

$$\frac{|\hat{A}_S|}{n} - \alpha \leq \alpha \left( \left( \frac{\mu \alpha n + \sqrt{2n \log |\check{\mathcal{S}}(A)|} + \sqrt{2\alpha n \log n}}{\mu \alpha n - \sqrt{2\alpha n \log n}} \right)^2 - 1 \right). \quad (26)$$

So by Lemma 2, we have

$$\text{Bias} \left( \frac{|\hat{A}_S|}{n} \mid H_n \right) = E \left[ \frac{|\hat{A}_S|}{n} - \alpha \mid H_n \right] \leq 2\alpha \left( \left( \frac{\mu \alpha n + \sqrt{2n \log |\check{\mathcal{S}}(A)|} + \sqrt{2\alpha n \log n}}{\mu \alpha n - \sqrt{2\alpha n \log n}} \right)^2 - 1 \right). \quad (27)$$

The result follows by combining Equations (19) and (27).  $\square$

**Lemma 7.** Let  $\mathbf{X} \sim \text{ASD}_S(A, \mu)$  where  $|\mathcal{S}| = \Omega(n)$  and  $|A| = \alpha n$  with  $0 < \alpha < 0.5$ . Assume  $\lim_{n \rightarrow \infty} P(A \subseteq \hat{A}_S) = 1$ . If  $\text{Bias}(|\hat{A}_S|/n) \geq \gamma$ , then

$$|\check{\mathcal{S}}(A)| \geq (C_{\mu, \gamma, \alpha})^n \cdot e^{-\Theta(\sqrt{n \log n})} \quad (28)$$

for sufficiently large  $n$ , where  $C_{\mu, \alpha, \gamma} = \exp \left( \frac{1}{2} \mu^2 \alpha^2 \left( \sqrt{1 + \frac{\gamma}{4\alpha}} - 1 \right)^2 \right)$ .

*Proof.* By Lemma 6, we have

$$\gamma \leq \text{Bias}(|\hat{A}_S|/n) \leq 2\alpha \left( \left( \frac{\mu \alpha n + \sqrt{2n \log |\check{\mathcal{S}}(A)|} + \sqrt{2\alpha n \log n}}{\mu \alpha n - \sqrt{2\alpha n \log n}} \right)^2 - 1 \right) + o(1). \quad (29)$$

Thus, the LHS of (29) is less than the RHS of (29), i.e.

$$\gamma \leq 2\alpha \left( \left( \frac{\mu \alpha n + \sqrt{2n \log |\check{\mathcal{S}}(A)|} + \sqrt{2\alpha n \log n}}{\mu \alpha n - \sqrt{2\alpha n \log n}} \right)^2 - 1 \right) + o(1) \quad (30)$$

Let  $n$  be sufficiently large so that the  $o(1)$  term in (30) is less than  $\frac{\gamma}{2}$ . Then, solving for  $|\check{\mathcal{S}}(A)|$  in (30):

$$\gamma \leq 2\alpha \left( \left( \frac{\mu \alpha n + \sqrt{2n \log |\check{\mathcal{S}}(A)|} + \sqrt{2\alpha n \log n}}{\mu \alpha n - \sqrt{2\alpha n \log n}} \right)^2 - 1 \right) + \frac{\gamma}{2}$$

$$\begin{aligned}
 &\Rightarrow \sqrt{\frac{\gamma}{4\alpha} + 1} \leq \frac{\mu\alpha n + \sqrt{2n \log |\check{S}(A)|} + \sqrt{2\alpha n \log n}}{\mu\alpha n - \sqrt{2\alpha n \log n}} \\
 &\Rightarrow \mu\alpha n \left( \sqrt{\frac{\gamma}{4\alpha} + 1} - 1 \right) - \Theta(\sqrt{n \log n}) \leq \sqrt{2n \log |\check{S}(A)|} \\
 &\Rightarrow |\check{S}(A)| \geq \left[ \exp \left( \frac{1}{2} \mu^2 \alpha^2 \left( \sqrt{\frac{\gamma}{4\alpha} + 1} - 1 \right)^2 \right) \right]^n \cdot e^{-\Theta(\sqrt{n \log n})}
 \end{aligned}$$

completing the proof.  $\square$

### F.3. Proof of Theorem

Using the above lemmas, we are now ready to prove Theorem 1 from the main text.

**Theorem 1.** Let  $\mathbf{X} = (X_1, \dots, X_n) \sim \text{ASD}_{\mathcal{S}}(A, \mu)$  where  $\mathcal{S} = \Omega(n)$  and  $|A| = \alpha n$  with  $0 < \alpha < 0.5$ . Suppose  $|\check{S}(A)|$  is sub-exponential in  $n$  and  $\lim_{n \rightarrow \infty} P(A \subseteq \hat{A}_{\mathcal{S}}) = 1$ . Then  $\lim_{n \rightarrow \infty} \text{Bias}(|\hat{A}_{\mathcal{S}}|/n) = 0$ .

*Proof.* Let  $\gamma > 0$  and let  $C_{\mu, \alpha, \gamma}$  be as defined in Lemma 7. Note that because  $C_{\mu, \alpha, \gamma} > 1$ , we have  $\frac{2C_{\mu, \alpha, \gamma}}{1+C_{\mu, \alpha, \gamma}} > 1$ .

Because  $|\check{S}(A)|$  is sub-exponential, there exists sufficiently large  $n$  so that

$$|\check{S}(A)| < \left( \frac{2C_{\mu, \alpha, \gamma}}{1+C_{\mu, \alpha, \gamma}} \right)^n. \quad (31)$$

We also note that because  $C_{\mu, \alpha, \gamma} > 1$ , then  $\frac{2}{1+C_{\mu, \alpha, \gamma}} < 1$ . For sufficiently large  $n$ ,  $e^{-\Theta(\sqrt{\log n/n})}$  will get arbitrarily close to 1. Thus, we have

$$e^{-\Theta(\sqrt{\log n/n})} \geq \frac{2}{1+C_{\mu, \alpha, \gamma}}. \quad (32)$$

Combining both (31) and (32) gives us

$$C_{\mu, \alpha, \gamma}^n \cdot e^{-\Theta(\sqrt{n \log n})} = \left( C_{\mu, \alpha, \gamma} \cdot e^{-\Theta(\sqrt{\log n/n})} \right)^n \geq \left( C_{\mu, \alpha, \gamma} \cdot \frac{2}{1+C_{\mu, \alpha, \gamma}} \right)^n > |\check{S}(A)|, \quad (33)$$

for sufficiently large  $n$ , where the first inequality follows by (32) and the second inequality follows by (31).

Thus, by the contrapositive of Lemma 7, it follows that  $\text{Bias}(|\hat{A}_{\mathcal{S}}|/n) < \gamma$  for sufficiently large  $n$ . Taking the limit as  $n \rightarrow \infty$  yields

$$\lim_{n \rightarrow \infty} \text{Bias}(|\hat{A}_{\mathcal{S}}|/n) \leq \gamma. \quad (34)$$

Because (34) holds for all  $\gamma > 0$ , it follows that  $\lim_{n \rightarrow \infty} \text{Bias}(|\hat{A}_{\mathcal{S}}|/n) \leq 0$ . Furthermore, because  $\lim_{n \rightarrow \infty} P(A \subseteq \hat{A}_{\mathcal{S}}) = 1$ , we also have  $\lim_{n \rightarrow \infty} \text{Bias}(|\hat{A}_{\mathcal{S}}|/n) \geq 0$ . Thus,  $\lim_{n \rightarrow \infty} \text{Bias}(|\hat{A}_{\mathcal{S}}|/n) = 0$ , as desired.  $\square$

### G. Proof of Theorem 2

In the following proof, we slightly abuse notation and assume that all statements of the form  $\lim_{n \rightarrow \infty} R_n = Y$ , where  $R_n$  and  $Y$  are random variables, hold almost surely.

**Theorem 2.** Let  $\mathbf{X} \sim \text{ASD}_{\mathcal{P}_n}(A, \mu)$  where  $|A| = \alpha n$  with  $0 < \alpha < 0.5$ . Then  $\lim_{n \rightarrow \infty} \text{Bias}(|\hat{A}_{\mathcal{P}_n}|/n) > 0$ .

*Proof.* From Proposition 1 in the main text, we have

$$\hat{A}_{\mathcal{P}_n} = \underset{S \subseteq [n]}{\text{argmax}} \frac{1}{\sqrt{|S|}} \sum_{v \in S} X_v. \quad (35)$$

Because the maximum is taken over all subsets of  $[n]$ , an equivalent formulation of the above is  $\hat{A}_{\mathcal{P}_n} = \{v : X_v > \hat{T}_S\}$ , where

$$\hat{T}_S = \operatorname{argmax}_{T \in \mathbb{R}} \left( \frac{1}{\sqrt{\#\{v \in [n] : X_v > T\}}} \sum_{v \in [n] : X_v > T} X_v \right). \quad (36)$$

We start by showing that  $\lim_{n \rightarrow \infty} \hat{T}_S$  is finite. To do so, we will find an expression for the RHS as  $n \rightarrow \infty$ . Let  $M_T = \{v \in [n] : X_v > T, v \in A\}$  and  $N_T = \{v \in [n] : X_v > T, v \notin A\}$ . Additionally, let  $\nu_{\mu, T}$  be the mean of a  $N(\mu, 1)$  distribution that is truncated to be above  $T$ . Then

$$\sum_{v \in [n] : X_v > T} X_v = \left( \frac{\sum_{v \in M_T} X_v}{|M_T|} \right) \cdot |M_T| + \left( \frac{\sum_{v \in N_T} X_v}{|N_T|} \right) \cdot |N_T| \quad (37)$$

By the strong law of large numbers,  $\lim_{n \rightarrow \infty} \frac{\sum_{v \in M_T} X_v}{|M_T|} = \nu_{\mu, T}$  and  $\lim_{n \rightarrow \infty} \frac{\sum_{v \in N_T} X_v}{|N_T|} = \nu_{0, T}$ . Similarly,  $\lim_{n \rightarrow \infty} \frac{|M_T|}{\alpha n \cdot (1 - \Phi(T - \mu))} = 1$  and  $\lim_{n \rightarrow \infty} \frac{|N_T|}{(1 - \alpha)n \cdot (1 - \Phi(T))} = 1$ , where  $\Phi$  is the CDF of a standard normal. Plugging these limits into (37) gives us

$$\lim_{n \rightarrow \infty} \frac{\sum_{v \in [n] : X_v > T} X_v}{\nu_{\mu, T} \cdot (\alpha n (1 - \Phi(T - \mu)) + \nu_{0, T} \cdot ((1 - \alpha)n (1 - \Phi(T))))} = 1. \quad (38)$$

A similar calculation yields

$$\lim_{n \rightarrow \infty} \frac{\sqrt{\#\{v \in [n] : X_v > T\}}}{\sqrt{\alpha n (1 - \Phi(T - \mu)) + (1 - \alpha)n (1 - \Phi(T))}} = 1. \quad (39)$$

Plugging in Equations (38) and (39) into Equation (36) yields

$$\begin{aligned} \lim_{n \rightarrow \infty} \hat{T}_S &= \lim_{n \rightarrow \infty} \left[ \operatorname{argmax}_{T \in \mathbb{R}} \left( \frac{\nu_{\mu, T} \cdot (\alpha n (1 - \Phi(T - \mu)) + \nu_{0, T} \cdot ((1 - \alpha)n (1 - \Phi(T))))}{\sqrt{\alpha n (1 - \Phi(T - \mu)) + (1 - \alpha)n (1 - \Phi(T))}} \right) \right] \\ &= \lim_{n \rightarrow \infty} \left[ \operatorname{argmax}_{T \in \mathbb{R}} \left( \frac{\nu_{\mu, T} \cdot (\alpha (1 - \Phi(T - \mu)) + \nu_{0, T} \cdot ((1 - \alpha)(1 - \Phi(T))))}{\sqrt{\alpha (1 - \Phi(T - \mu)) + (1 - \alpha)(1 - \Phi(T))}} \cdot \sqrt{n} \right) \right] \\ &= \operatorname{argmax}_{T \in \mathbb{R}} \left( \frac{\nu_{\mu, T} \cdot (\alpha (1 - \Phi(T - \mu)) + \nu_{0, T} \cdot ((1 - \alpha)(1 - \Phi(T))))}{\sqrt{\alpha (1 - \Phi(T - \mu)) + (1 - \alpha)(1 - \Phi(T))}} \right). \end{aligned} \quad (40)$$

Thus  $\lim_{n \rightarrow \infty} \hat{T}_S$  is finite.

Next, define  $T^* = \lim_{n \rightarrow \infty} \hat{T}_S$ . To complete the proof, we use  $T^*$  to derive an expression for  $\lim_{n \rightarrow \infty} \frac{|\hat{A}_{\mathcal{P}_n}|}{n}$ , and then use that expression to bound  $\lim_{n \rightarrow \infty} \operatorname{Bias} \left( \frac{|\hat{A}_{\mathcal{P}_n}|}{n} \right)$ .

Since the fraction of observations  $X_i$  such that  $i \in A$  and  $X_i > \hat{T}_S$  is asymptotically  $\frac{|A|}{n} \cdot (1 - \Phi(\hat{T}_S - \mu))$ , it follows that

$$\lim_{n \rightarrow \infty} \frac{|A \cap \hat{A}_{\mathcal{P}_n}|}{n} = \lim_{n \rightarrow \infty} \left( \frac{|A|}{n} \cdot (1 - \Phi(\hat{T}_S - \mu)) \right) = \alpha \cdot (1 - \Phi(T^* - \mu)). \quad (41)$$

Similarly, the fraction of observations  $X_i$  such that  $i \notin A$  and  $X_i > \hat{T}_S$  is asymptotically  $\left(1 - \frac{|A|}{n}\right) \cdot (1 - \Phi(\hat{T}_S))$ , so we have

$$\lim_{n \rightarrow \infty} \frac{|A^c \cap \hat{A}_{\mathcal{P}_n}|}{n} = \lim_{n \rightarrow \infty} \left( \left(1 - \frac{|A|}{n}\right) \cdot (1 - \Phi(\hat{T}_S)) \right) = (1 - \alpha) \cdot (1 - \Phi(T^*)). \quad (42)$$

Combining Equations (41) and (42) gives us

$$\lim_{n \rightarrow \infty} \frac{|\hat{A}_{\mathcal{P}_n}|}{n} = \alpha \cdot (1 - \Phi(T^* - \mu)) + (1 - \alpha) \cdot (1 - \Phi(T^*)) \quad (43)$$

Thus, the asymptotic bias of the MLE  $\hat{A}_{\mathcal{S}}$  is

$$\begin{aligned} \lim_{n \rightarrow \infty} \text{Bias}(|\hat{A}_{\mathcal{P}_n}|/n) &= \lim_{n \rightarrow \infty} E[|\hat{A}_{\mathcal{P}_n}|/n] - \alpha \\ &= \alpha \cdot (1 - \Phi(T^* - \mu)) + (1 - \alpha) \cdot (1 - \Phi(T^*)) - \alpha. \end{aligned}$$

Since the above expression is always positive for  $\alpha < 0.5$ , so it follows that  $\lim_{n \rightarrow \infty} \text{Bias}(|\hat{A}_{\mathcal{P}_n}|/n) > 0$ .  $\square$

## H. Proof of Theorem 3 and Corollaries 1, 2

To prove Theorem 3, we require the following Lemma.

**Lemma 8.** *Let  $X_1, \dots, X_n \stackrel{i.i.d.}{\sim} N(\mu, \sigma^2)$ . Then*

$$P\left(\max_{i \in [n]} X_i \leq \mu + 2\sigma\sqrt{\log n}\right) \geq 1 - \frac{1}{n}. \quad (44)$$

*Proof.* For fixed  $i \in [n]$  we have

$$\begin{aligned} P(X_i > \mu + 2\sigma\sqrt{\log n}) &= P(Z > 2\sqrt{\log n}), \text{ where } Z \sim N(0, 1) \\ &\leq \frac{1}{\sqrt{2\pi}} \cdot \frac{1}{2\sqrt{\log n}} \cdot \frac{1}{n^2} < \frac{1}{n^2} \end{aligned} \quad (45)$$

where in the second line we use the standard bound  $P(Z \geq x) \leq \frac{1}{\sqrt{2\pi}} \cdot \frac{1}{x} e^{-x^2/2}$ . Thus,  $P(X_i \leq \mu + 2\sigma\sqrt{\log n}) \geq 1 - \frac{1}{n^2}$ . By a union bound, it follows that

$$P(X_i \leq \mu + 2\sigma\sqrt{\log n} \text{ for all } i \in [n]) \geq 1 - \frac{1}{n}, \quad (46)$$

which implies the desired result.  $\square$

**Theorem 3.** *Let  $\mathbf{X} = (X_1, \dots, X_n) \sim \text{ASD}_{\mathcal{S}}(A, \mu)$ , where  $|A| = \alpha n$  for  $0 < \alpha < 0.5$  and  $\mu \geq C\sqrt{\log n}$  for a sufficiently large constant  $C > 0$ . For sufficiently large  $n$ , we have that*

$$|\hat{\alpha}_{\text{GMM}} - \alpha| \leq \sqrt{\frac{\log n}{n}} \quad \text{and} \quad |\hat{\mu}_{\text{GMM}} - \mu| \leq 3\sqrt{\frac{\log n}{n}}$$

with probability at least  $1 - \frac{1}{n}$ .

*Proof.* For  $\tilde{\alpha} \in (0, 1)$  and  $\tilde{\mu} > 0$ , let  $L_{\tilde{\alpha}, \tilde{\mu}}(x) = \log(\tilde{\alpha} \cdot \exp(-\frac{1}{2}(x - \tilde{\mu})^2) + (1 - \tilde{\alpha}) \cdot \exp(-\frac{1}{2}x^2))$  be the (scaled) log-likelihood function for the mixture distribution  $\tilde{\alpha} \cdot N(\tilde{\mu}, 1) + (1 - \tilde{\alpha}) \cdot N(0, 1)$ , and define  $L_{\tilde{\alpha}, \tilde{\mu}}(\mathbf{X}) = \prod_{i=1}^n L_{\tilde{\alpha}, \tilde{\mu}}(X_i)$ . Then

$$\hat{\alpha}_{\text{GMM}}, \hat{\mu}_{\text{GMM}} = \underset{\substack{\tilde{\alpha} \in (0, 1) \\ \tilde{\mu} \in (0, \infty)}}{\text{argmax}} L_{\tilde{\alpha}, \tilde{\mu}}(\mathbf{X}) \quad (47)$$

To prove the claim, it suffices to show that if  $|\hat{\alpha}_{\text{GMM}} - \alpha| > \sqrt{\frac{\log n}{n}}$  or  $|\hat{\mu}_{\text{GMM}} - \mu| > 3\sqrt{\frac{\log n}{n}}$ , then  $L_{\alpha, \mu}(\mathbf{X}) > L_{\tilde{\alpha}, \tilde{\mu}}(\mathbf{X})$  with probability at least  $1 - \frac{1}{n}$ .

We will prove the following equivalent formulation: if  $\kappa, \tau$  are real numbers such that  $|\kappa| > \sqrt{\frac{\log n}{n}}$  or  $|\tau| > 3\sqrt{\frac{\log n}{n}}$ , then

$$L_{\alpha, \mu}(\mathbf{X}) > L_{\alpha + \kappa, \mu + \tau}(\mathbf{X}) \quad (48)$$

with probability at least  $1 - \frac{1}{n}$ .

We proceed by a case analysis based on whether  $\kappa$  and  $\tau$  also satisfy the following additional conditions:

$$\frac{1}{n^2} < \alpha + \kappa < 1 - \frac{1}{n^2}, \quad (49)$$

$$\frac{\mu^2}{\tau^2} > 100. \quad (50)$$

Briefly, the intuition for the above conditions is that if  $\kappa$  and  $\tau$  satisfy (49) and (50), then we can derive a simplified formula for the likelihood  $L_{\alpha+\kappa, \mu+\tau}(\mathbf{X})$ .

In all cases, we assume that  $\mu - 2\sqrt{\log n} \leq X_i \leq \mu + 2\sqrt{\log n}$  for  $i \in A$  and  $-2\sqrt{\log n} \leq X_i \leq 2\sqrt{\log n}$  for  $i \notin A$ , as these events hold with probability at least  $1 - \frac{1}{n}$  by Lemma 8.

**Case 1:  $\kappa$  satisfies (49) and  $\tau$  satisfies (50).** The log-likelihood  $L_{\alpha+\kappa, \mu+\tau}(\mathbf{X})$  can be written as

$$\begin{aligned} L_{\alpha+\kappa, \mu+\tau}(\mathbf{X}) &= \log \left( \prod_{i=1}^n \left( (\alpha + \kappa) \cdot \exp \left( -\frac{1}{2}(X_i - \mu - \tau)^2 \right) + (1 - \alpha - \kappa) \cdot \exp \left( -\frac{X_i^2}{2} \right) \right) \right) \\ &= \sum_{i=1}^n \log \left( (\alpha + \kappa) \cdot \exp \left( -\frac{1}{2}(X_i - \mu - \tau)^2 \right) + (1 - \alpha - \kappa) \cdot \exp \left( -\frac{X_i^2}{2} \right) \right) \end{aligned} \quad (51)$$

Let  $T_1 = (\alpha + \kappa) \cdot \exp \left( -\frac{1}{2}(X_i - \mu - \tau)^2 \right)$  be the first term in the logarithm and let  $T_2 = (1 - \alpha - \kappa) \cdot \exp \left( -\frac{X_i^2}{2} \right)$  be the second term. We claim that if  $i \in A$ , then  $T_1 + T_2 = (1 + o(n^{-1}))T_1$ , while if  $i \notin A$  then  $T_1 + T_2 = (1 + o(n^{-1}))T_2$ .

To show that  $T_1 + T_2 = (1 + o(n^{-1}))T_1$  for  $i \in A$ , we compute  $\frac{T_2}{T_1}$ :

$$\begin{aligned} \frac{T_2}{T_1} &= \frac{(1 - \alpha - \kappa) \cdot \exp \left( -\frac{X_i^2}{2} \right)}{(\alpha + \kappa) \cdot \exp \left( -\frac{1}{2}(X_i - \mu - \tau)^2 \right)} \\ &= \left( \frac{1 - \alpha - \kappa}{\alpha + \kappa} \right) \cdot \exp \left( -X_i(\mu + \tau) + \frac{1}{2}(\mu + \tau)^2 \right) \\ &\leq \left( \frac{1 - \alpha - \kappa}{\alpha + \kappa} \right) \cdot \exp \left( -(\mu - 2\sqrt{\log n})(\mu + \tau) + \frac{1}{2}(\mu + \tau)^2 \right) \\ &= \left( \frac{1 - \alpha - \kappa}{\alpha + \kappa} \right) \cdot \exp \left( -\frac{1}{2}\mu^2 + \frac{1}{2}\tau^2 + 2\mu\sqrt{\log n} + 2\tau\sqrt{\log n} \right) \\ &\leq n^2 \cdot \exp \left( -\frac{1}{2}\mu^2 + \frac{1}{2} \left( \frac{\mu^2}{100} \right) + 2\mu\sqrt{\log n} + 2 \left( \frac{\mu}{10} \right) \sqrt{\log n} \right) \\ &= n^2 \cdot \exp \left( -\frac{99}{200}\mu^2 + \frac{11}{5}\mu\sqrt{\log n} \right), \end{aligned} \quad (52)$$

where the first inequality uses that  $X_i \geq \mu - 2\sqrt{\log n}$  and the second inequality uses that  $\tau \leq \frac{\mu}{10}$  (which follows from (50)).

Now  $-\frac{99}{200}t^2 + \frac{11}{5}t\sqrt{\log n}$  is a concave quadratic with a maximum at  $t = \frac{20}{9}\sqrt{\log n}$ . Since  $\mu \geq C\sqrt{\log n} > \frac{20}{9}\sqrt{\log n}$  (for sufficiently large  $C$ ), it follows that  $-\frac{99}{200}\mu^2 + \frac{11}{5}\mu\sqrt{\log n} \leq -\frac{99}{200}(C\sqrt{\log n})^2 + \frac{11}{5}(C\sqrt{\log n}) \cdot \sqrt{\log n}$ . Plugging this into the above equation yields

$$\begin{aligned} n^2 \cdot \exp \left( -\frac{99}{200}\mu^2 + \frac{11}{5}\mu\sqrt{\log n} \right) &\leq n^2 \cdot \exp \left( -\frac{99}{200}(C\sqrt{\log n})^2 + \frac{11}{5}(C\sqrt{\log n}) \cdot \sqrt{\log n} \right) \\ &= n^2 \cdot n^{-\frac{99}{200}C^2 + \frac{440}{200}C} \\ &= o(n^{-1}) \text{ for sufficiently large } C. \end{aligned} \quad (53)$$

Thus,  $\frac{T_2}{T_1} = o(n^{-1})$ , which implies  $T_1 + T_2 = (1 + o(n^{-1}))T_1$  for  $i \in A$ . By a similar derivation, we also have that  $T_1 + T_2 = (1 + o(n^{-1}))T_2$  for  $i \notin A$ .

Using these relationships between  $T_1$  and  $T_2$ , we rewrite the log-likelihood in Equation (51) as

$$\begin{aligned} L_{\alpha+\kappa, \mu+\tau}(\mathbf{X}) &= \sum_{i \in A} \log((1 + o(n^{-1})) \cdot T_1) + \sum_{i \notin A} \log((1 + o(n^{-1})) \cdot T_2) \\ &= \sum_{i \in A} \log\left((1 + o(n^{-1})) \cdot (\alpha + \kappa) \exp\left(-\frac{1}{2}(X_i - \mu - \tau)^2\right)\right) + \sum_{i \notin A} \log\left((1 + o(n^{-1})) \cdot (1 - \alpha - \kappa) \exp\left(-\frac{X_i^2}{2}\right)\right) \\ &= \alpha n \cdot \log(\alpha + \kappa) + (1 - \alpha)n \cdot \log(1 - \alpha - \kappa) - \frac{1}{2} \sum_{i \in A} (X_i - \mu - \tau)^2 - \frac{1}{2} \sum_{i \notin A} X_i^2 + o(1). \end{aligned} \quad (54)$$

Plugging in  $\kappa = \tau = 0$  into (54) yields the following expression for the log-likelihood  $L_{\alpha, \mu}(\mathbf{X})$  with the true parameters  $\alpha, \mu$ :

$$L_{\alpha, \mu}(\mathbf{X}) = \alpha n \cdot \log \alpha + (1 - \alpha)n \cdot \log(1 - \alpha) - \frac{1}{2} \sum_{i \in A} (X_i - \mu)^2 - \frac{1}{2} \sum_{i \notin A} X_i^2 + o(1). \quad (55)$$

So after equating equations (54) and (55) and simplifying, we have that  $L_{\alpha, \mu}(\mathbf{X}) > L_{\alpha+\kappa, \mu+\tau}(\mathbf{X})$  is equivalent to

$$\begin{aligned} L_{\alpha, \mu}(\mathbf{X}) &> L_{\alpha+\kappa, \mu+\tau}(\mathbf{X}) \\ \Leftrightarrow \alpha \log\left(\frac{\alpha}{\alpha + \kappa}\right) + (1 - \alpha) \log\left(\frac{1 - \alpha}{1 - \alpha - \kappa}\right) + \frac{\tau \alpha}{2} \left(\tau - 2 \frac{\sum_{i \in A} (X_i - \mu)}{\alpha n}\right) + o(n^{-1}) &> o(n^{-1}), \end{aligned}$$

To prove that  $L_{\alpha, \mu}(\mathbf{X}) > L_{\alpha+\kappa, \mu+\tau}(\mathbf{X})$  and complete the proof, it suffices to show that

$$\alpha \log\left(\frac{\alpha}{\alpha + \kappa}\right) + (1 - \alpha) \log\left(\frac{1 - \alpha}{1 - \alpha - \kappa}\right) + \frac{\tau \alpha}{2} \left(\tau - 2 \frac{\sum_{i \in A} (X_i - \mu)}{\alpha n}\right) = \Omega(n^{-1}). \quad (56)$$

To bound the above inequality, we first note that the first two terms  $\alpha \log\left(\frac{\alpha}{\alpha + \kappa}\right) + (1 - \alpha) \log\left(\frac{1 - \alpha}{1 - \alpha - \kappa}\right)$  are the KL-divergence between a  $\text{Bern}(\alpha)$  random variable and a  $\text{Bern}(\alpha + \kappa)$  random variable. By Pinsker's inequality, we have

$$\begin{aligned} \alpha \log\left(\frac{\alpha}{\alpha + \kappa}\right) + (1 - \alpha) \log\left(\frac{1 - \alpha}{1 - \alpha - \kappa}\right) &= D_{KL}(\text{Bern}(\alpha) \parallel \text{Bern}(\alpha + \kappa)) \\ &\geq 2 [d_{TV}(\text{Bern}(\alpha), \text{Bern}(\alpha + \kappa))]^2 \\ &= 2\kappa^2. \end{aligned} \quad (57)$$

Second, we note that  $\frac{\sum_{i \in A} (X_i - \mu)}{\alpha n} \sim N(0, \frac{1}{\alpha n})$ , so by Lemma 8, we have that  $\frac{\sum_{i \in A} (X_i - \mu)}{\alpha n} < \sqrt{\frac{\log n}{\alpha n}}$  with high probability. Thus,

$$\alpha \log\left(\frac{\alpha}{\alpha + \kappa}\right) + (1 - \alpha) \log\left(\frac{1 - \alpha}{1 - \alpha - \kappa}\right) + \frac{\tau \alpha}{2} \left(\tau - 2 \frac{\sum_{i \in A} (X_i - \mu)}{\alpha n}\right) \geq 2\kappa^2 + \frac{\tau \alpha}{2} \left(\tau - 2 \sqrt{\frac{\log n}{n}}\right) \quad (58)$$

To prove that the RHS of (58) is  $\Omega(n^{-1})$ , we use casework depending on whether  $|\kappa| > \sqrt{\frac{\log n}{n}}$  or  $|\tau| > 3\sqrt{\frac{\log n}{n}}$ .

**Case 1, Sub-case 1:**  $|\kappa| > \sqrt{\frac{\log n}{n}}$ .

We bound the RHS of (58) as

$$\begin{aligned}
 2\kappa^2 + \frac{\tau\alpha}{2} \left( \tau - 2\sqrt{\frac{\log n}{n}} \right) &\geq 2\frac{\log n}{n} + \frac{\tau\alpha}{2} \left( \tau - 2\sqrt{\frac{\log n}{n}} \right) \\
 &\geq 2\frac{\log n}{n} - \frac{\alpha}{2} \cdot \frac{\log n}{n} \\
 &= \frac{\log n}{n} \cdot \left( 2 - \frac{\alpha}{2} \right) \\
 &= \Omega(n^{-1}),
 \end{aligned} \tag{59}$$

where the second inequality uses that  $\frac{\tau\alpha}{2} \left( \tau - 2\sqrt{\frac{\log n}{n}} \right)$  is a quadratic in  $\tau$  whose minimum is  $-\frac{\alpha}{2} \frac{\log n}{n}$ .

**Case 1, Sub-case 2:**  $|\tau| > 3\sqrt{\frac{\log n}{n}}$ .

Note that the condition on  $\tau$  implies that either  $\tau > 3\sqrt{\frac{\log n}{n}}$  or  $\tau < -3\sqrt{\frac{\log n}{n}}$ .

We also note that  $\frac{\tau\alpha}{2} \left( \tau - 2\sqrt{\frac{\log n}{n}} \right)$  is a quadratic in  $\tau$  that is decreasing for  $\tau < \sqrt{\frac{\log n}{n}}$  and is increasing for  $\tau > \sqrt{\frac{\log n}{n}}$ .

Depending on the value of  $\tau$ , we lower bound  $\frac{\tau\alpha}{2} \left( \tau - 2\sqrt{\frac{\log n}{n}} \right)$  as follows:

$$\begin{aligned}
 \tau > 3\sqrt{\frac{\log n}{n}} &\implies \frac{\tau\alpha}{2} \left( \tau - 2\sqrt{\frac{\log n}{n}} \right) > \frac{\alpha}{2} \left( 3\sqrt{\frac{\log n}{n}} \right) \left( 3\sqrt{\frac{\log n}{n}} - 2\sqrt{\frac{\log n}{n}} \right) = \frac{3\alpha \log n}{2n} \\
 \tau < -3\sqrt{\frac{\log n}{n}} &\implies \frac{\tau\alpha}{2} \left( \tau - 2\sqrt{\frac{\log n}{n}} \right) > \frac{\alpha}{2} \left( -3\sqrt{\frac{\log n}{n}} \right) \left( -3\sqrt{\frac{\log n}{n}} - 2\sqrt{\frac{\log n}{n}} \right) = \frac{15\alpha \log n}{2n}.
 \end{aligned}$$

In either case, we have that  $\frac{\tau\alpha}{2} \left( \tau - 2\sqrt{\frac{\log n}{n}} \right) > \frac{3\alpha \log n}{2n}$ . Thus the RHS of (58) is

$$2\kappa^2 + \frac{\tau\alpha}{2} \left( \tau - 2\sqrt{\frac{\log n}{n}} \right) \geq \frac{3\alpha \log n}{2n} = \Omega(n^{-1}), \tag{60}$$

as desired.

**Case 2:**  $\kappa$  does not satisfy (49),  $\tau$  satisfies (50). This means that either  $\alpha + \kappa < \frac{1}{n^2}$  or  $\alpha + \kappa > 1 - \frac{1}{n^2}$ . We will treat each of these sub-cases separately.

Before doing so, we require the following lower bound on  $L_{\alpha,\mu}(\mathbf{X})$ : for sufficiently large  $n$ ,  $L_{\alpha,\mu}(\mathbf{X}) > -n$ . To prove this lower bound, from (55) we have

$$\begin{aligned}
 L_{\alpha,\mu}(\mathbf{X}) &= n \cdot \log(1 + o(n^{-1})) + \alpha n \cdot \log \alpha + (1 - \alpha)n \cdot \log(1 - \alpha) - \frac{1}{2} \sum_{i \in A} (X_i - \mu)^2 - \frac{1}{2} \sum_{i \notin A} X_i^2 \\
 &= n \left( \log(1 + o(n^{-1})) + H(\alpha) - \frac{\alpha}{2} \left( \frac{\sum_{i \in A} (X_i - \mu)^2}{\alpha n} \right) - \frac{1 - \alpha}{2} \left( \frac{\sum_{i \notin A} X_i^2}{(1 - \alpha)n} \right) \right) \\
 &\geq n \left( -\frac{\alpha}{2} \left( \frac{\sum_{i \in A} (X_i - \mu)^2}{\alpha n} \right) - \frac{1 - \alpha}{2} \left( \frac{\sum_{i \notin A} X_i^2}{(1 - \alpha)n} \right) \right).
 \end{aligned} \tag{61}$$

where  $H(\alpha)$  is the binary entropy function. By standard tail bounds on  $\chi^2$  random variables (see e.g. Lemma 1 of (Laurent & Massart, 2000)), we have that  $\frac{\sum_{i \in A} (X_i - \mu)^2}{\alpha n} \leq 2$  and  $\frac{\sum_{i \notin A} (X_i - \mu)^2}{(1 - \alpha)n} \leq 2$  with probability at least  $1 - \frac{1}{n^3}$ , for sufficiently

large  $n$ . Plugging these upper bounds into (61) yields

$$L_{\alpha,\mu}(\mathbf{X}) \geq n \left( -\frac{\alpha}{2} \left( \frac{\sum_{i \in A} (X_i - \mu)^2}{\alpha n} \right) - \frac{1-\alpha}{2} \left( \frac{\sum_{i \notin A} X_i^2}{(1-\alpha)n} \right) \right) \geq n(-\alpha - (1-\alpha)) = -n. \quad (62)$$

**Case 2, Sub-case 1:**  $\alpha + \kappa < \frac{1}{n^2}$ .

Our strategy for this sub-case, as well as the subsequent ones, will be to upper bound  $L_{\alpha+\kappa,\mu+\tau}(\mathbf{X})$  and show that  $L_{\alpha+\kappa,\mu+\tau}(\mathbf{X}) < -n \leq L_{\alpha,\mu}(\mathbf{X})$ .

We have

$$\begin{aligned} L_{\alpha+\kappa,\mu+\tau}(\mathbf{X}) &= \sum_{i=1}^n \log \left( (\alpha + \kappa) \cdot \exp \left( -\frac{1}{2} (X_i - \mu - \tau)^2 \right) + (1 - \alpha - \kappa) \cdot \exp \left( -\frac{X_i^2}{2} \right) \right) \\ &\leq \sum_{i \in A} \log \left( (\alpha + \kappa) \cdot \exp \left( -\frac{1}{2} (X_i - \mu - \tau)^2 \right) + (1 - \alpha - \kappa) \cdot \exp \left( -\frac{X_i^2}{2} \right) \right). \end{aligned} \quad (63)$$

We upper bound the first term  $(\alpha + \kappa) \cdot \exp \left( -\frac{1}{2} (X_i - \mu - \tau)^2 \right)$  in the logarithm by

$$(\alpha + \kappa) \cdot \exp \left( -\frac{1}{2} (X_i - \mu - \tau)^2 \right) \leq \alpha + \kappa < \frac{1}{n^2}. \quad (64)$$

We upper bound the second term  $(1 - \alpha - \kappa) \cdot \exp \left( -\frac{X_i^2}{2} \right)$  in the logarithm as

$$\begin{aligned} (1 - \alpha - \kappa) \cdot \exp \left( -\frac{X_i^2}{2} \right) &\leq \exp \left( -\frac{X_i^2}{2} \right) \\ &\leq \exp \left( -\frac{1}{2} (\mu - 2\sqrt{\log n})^2 \right) \\ &\leq \exp \left( -\frac{1}{2} (C\sqrt{\log n} - 2\sqrt{\log n})^2 \right), \\ &= n^{-(C-2)^2/2} \\ &\leq n^{-2} \text{ for sufficiently large } C, \end{aligned} \quad (65)$$

where the first inequality follows from the assumption that,  $X_i > \mu - 2\sqrt{\log n}$  and the second inequality follows the fact that  $\mu \geq C\sqrt{\log n} > 2\sqrt{\log n}$  and  $-\frac{1}{2}(\mu - 2\sqrt{\log n})^2$  is decreasing for  $\mu > 2\sqrt{\log n}$ .

Combining the upper bounds in (64) and (65) gives us the following upper bound on  $L_{\alpha+\kappa,\mu+\tau}(\mathbf{X})$ :

$$L_{\alpha+\kappa,\mu+\tau}(\mathbf{X}) \leq \sum_{i \in A} \log(n^{-2} + n^{-2}) = \alpha n (\log(2n^{-2})) = -\Theta(n \log n). \quad (66)$$

Thus, for sufficiently large  $n$ , we have that  $L_{\alpha+\kappa,\mu+\tau}(\mathbf{X}) \leq \alpha n (\log(2n^{-2})) < -n = L_{\alpha,\mu}(\mathbf{X})$ , as desired.

**Case 2, Sub-case 2:**  $\alpha + \kappa > 1 - \frac{1}{n^2}$ .

As in the previous sub-case, we will prove that  $L_{\alpha+\kappa,\mu+\tau}(\mathbf{X}) < -n \leq L_{\alpha,\mu}(\mathbf{X})$ .



Since (50) holds, we have that  $\frac{\mu^2}{\tau^2} > 100$ , or equivalently  $\frac{9}{10}\mu < \mu + \tau < \frac{11}{10}\mu$ . We upper bound  $L_{\alpha+\kappa,\mu+\tau}(\mathbf{X})$  as

$$\begin{aligned}
 L_{\alpha+\kappa,\mu+\tau}(\mathbf{X}) &\leq \sum_{i \notin A} \log \left( (\alpha + \kappa) \cdot \exp \left( -\frac{1}{2}(X_i - \mu - \tau)^2 \right) + (1 - \alpha - \kappa) \cdot \exp \left( -\frac{X_i^2}{2} \right) \right) \\
 &\leq \sum_{i \notin A} \log \left( \exp \left( -\frac{1}{2}(X_i - (\mu + \tau))^2 \right) + \frac{1}{n^2} \right) \\
 &\leq \sum_{i \notin A} \log \left( \exp \left( -\frac{1}{2}(2\sqrt{\log n} - \frac{9}{10}C\sqrt{\log n})^2 \right) + \frac{1}{n^2} \right) \\
 &= \sum_{i \notin A} \log \left( n^{-\frac{1}{2}(2-\frac{9}{10}C)^2} + n^{-2} \right) \\
 &\leq \sum_{i \notin A} \log (n^{-2} + n^{-2}) \text{ for sufficiently large } C \\
 &= (1 - \alpha)n \log(2n^{-2}),
 \end{aligned} \tag{67}$$

where the second inequality follows from the assumption that  $1 - \frac{1}{n^2} < \alpha + \kappa < 1$ , and the third inequality follows from the fact that  $X_i \leq 2\sqrt{\log n} \leq \frac{9}{10}C\sqrt{\log n} \leq \frac{9}{10}\mu \leq \mu + \tau$  for sufficiently large  $C$ .

For sufficiently large  $n$ , we have that  $L_{\alpha+\kappa,\mu+\tau}(\mathbf{X}) \leq (1 - \alpha)n \log(2n^{-2}) = -\Theta(n \log n) < -n \leq L_{\alpha,\mu}(\mathbf{X})$ , as desired.

**Case 3:  $\tau$  does not satisfy (50).**

Since  $\tau$  does not satisfy (50), we have that either  $\mu + \tau > \frac{11}{10}\mu$  or  $\mu + \tau < \frac{9}{10}\mu$ . We treat each of these sub-cases separately. In each sub-case, we use the bound  $L_{\alpha,\mu}(\mathbf{X}) > -n$  derived in Case 2.

**Case 3, Sub-case 1:  $\mu + \tau > \frac{11}{10}\mu$ .**

As before, we will show that  $L_{\alpha+\kappa,\mu+\tau}(\mathbf{X}) < -n \leq L_{\alpha,\mu}(\mathbf{X})$ . We upper bound  $L_{\alpha+\kappa,\mu+\tau}(\mathbf{X})$  as

$$\begin{aligned}
 L_{\alpha+\kappa,\mu+\tau}(\mathbf{X}) &= \sum_{i=1}^n \log \left( (\alpha + \kappa) \cdot \exp \left( -\frac{1}{2}(X_i - \mu - \tau)^2 \right) + (1 - \alpha - \kappa) \cdot \exp \left( -\frac{X_i^2}{2} \right) \right) \\
 &\leq \sum_{i \in A} \log \left( \exp \left( -\frac{1}{2}(X_i - (\mu + \tau))^2 \right) + \exp \left( -\frac{X_i^2}{2} \right) \right) \\
 &\leq \sum_{i \in A} \log \left( \exp \left( -\frac{1}{2} \left( \mu + 2\sqrt{\log n} - \frac{11}{10}\mu \right)^2 \right) + \exp \left( -\frac{1}{2}(\mu - 2\sqrt{\log n})^2 \right) \right) \\
 &= \sum_{i \in A} \log \left( \exp \left( -\frac{1}{2} \left( \frac{1}{10}\mu - 2\sqrt{\log n} \right)^2 \right) + \exp \left( -\frac{1}{2}(\mu - 2\sqrt{\log n})^2 \right) \right) \\
 &\leq \sum_{i \in A} \log \left( \exp \left( -\frac{1}{2} \left( \frac{1}{10}C\sqrt{\log n} + 2\sqrt{\log n} \right)^2 \right) + \exp \left( -\frac{1}{2}(C\sqrt{\log n} - 2\sqrt{\log n})^2 \right) \right) \\
 &= \sum_{i \in A} \log \left( n^{-\frac{1}{2}(\frac{C}{10}+2)^2} + n^{-\frac{1}{2}(C-2)^2} \right) \\
 &\leq \sum_{i \in A} \log (n^{-2} + n^{-2}) \text{ for sufficiently large } C,
 \end{aligned} \tag{68}$$

The first inequality uses that  $\alpha + \kappa \leq 1$  and  $1 - \alpha - \kappa \leq 1$ . The second inequality uses that  $X_i \leq \mu + 2\sqrt{\log n} < \frac{11}{10}\mu < \mu + \tau$  (where  $\mu + 2\sqrt{\log n} < \frac{11}{10}\mu \Leftrightarrow \mu \geq 20\sqrt{\log n}$  holds for sufficiently large  $C$ ), and  $X_i \geq \mu - 2\sqrt{\log n}$ . The third inequality uses that  $\frac{1}{10}\mu \geq \frac{1}{10}C\sqrt{\log n} > 2\sqrt{\log n}$  and  $\mu \geq C\sqrt{\log n} > 2\sqrt{\log n}$  (for sufficiently large  $C$ ).

Thus, for sufficiently large  $n$  we have  $L_{\alpha+\kappa,\mu+\tau}(\mathbf{X}) \leq -\alpha n \log(2n^{-2}) < -n = L_{\alpha,\mu}(\mathbf{X})$ , as desired.

**Case 3, Sub-case 2:  $\mu + \tau < \frac{9}{10}\mu$ .**

As before, we will show that  $L_{\alpha+\kappa,\mu+\tau}(\mathbf{X}) < -n \leq L_{\alpha,\mu}(\mathbf{X})$ . We upper bound  $L_{\alpha+\kappa,\mu+\tau}(\mathbf{X})$  as

$$\begin{aligned}
 L_{\alpha+\kappa,\mu+\tau}(\mathbf{X}) &= \sum_{i=1}^n \log \left( (\alpha + \kappa) \cdot \exp \left( -\frac{1}{2} (X_i - \mu - \tau)^2 \right) + (1 - \alpha - \kappa) \cdot \exp \left( -\frac{X_i^2}{2} \right) \right) \\
 &\leq \sum_{i \in A} \log \left( \exp \left( -\frac{1}{2} (X_i - (\mu + \tau))^2 \right) + \exp \left( -\frac{X_i^2}{2} \right) \right) \\
 &\leq \sum_{i \in A} \log \left( \exp \left( -\frac{1}{2} \left( (\mu - 2\sqrt{\log n}) - \frac{9}{10}\mu \right)^2 \right) + \exp \left( -\frac{1}{2} (\mu - 2\sqrt{\log n})^2 \right) \right) \\
 &= \sum_{i \in A} \log \left( \exp \left( -\frac{1}{2} \left( \frac{1}{10}\mu - 2\sqrt{\log n} \right)^2 \right) + \exp \left( -\frac{1}{2} (\mu - 2\sqrt{\log n})^2 \right) \right) \tag{69} \\
 &\leq \sum_{i \in A} \log \left( \exp \left( -\frac{1}{2} \left( \frac{1}{10}C\sqrt{\log n} - 2\sqrt{\log n} \right)^2 \right) + \exp \left( -\frac{1}{2} (C\sqrt{\log n} - 2\sqrt{\log n})^2 \right) \right) \\
 &= \sum_{i \in A} \log \left( n^{-\frac{1}{2}(\frac{C}{10}-2)^2} + n^{-\frac{1}{2}(C-2)^2} \right) \\
 &\leq \sum_{i \in A} \log (n^{-2} + n^{-2}) \text{ for sufficiently large } C.
 \end{aligned}$$

The first inequality uses that  $\alpha + \kappa \leq 1$  and  $1 - \alpha - \kappa \leq 1$ . The second inequality uses that  $\mu + \tau < \frac{9}{10}\mu < \mu - 2\sqrt{\log n} \leq X_i$  (where the middle inequality  $\frac{9}{10}\mu < \mu - 2\sqrt{\log n} \Leftrightarrow \mu > 20\sqrt{\log n}$  holds for sufficiently large  $C$ ) and  $X_i > \mu - 2\sqrt{\log n}$ . The third inequality uses that  $\frac{1}{10}\mu > \frac{1}{10}C\sqrt{\log n} > 2\sqrt{\log n}$  and  $\mu > C\sqrt{\log n} > 2\sqrt{\log n}$  for sufficiently large  $C$ .

So as before, for sufficiently large  $n$  we have  $L_{\alpha+\kappa,\mu+\tau}(\mathbf{X}) \leq -\alpha n \log(2n^{-2}) < -n = L_{\alpha,\mu}(\mathbf{X})$ , as desired.  $\square$

### H.1. Proofs of Corollaries

**Corollary 1.** Let  $\mathbf{X} = (X_1, \dots, X_n) \sim \text{ASD}_S(A, \mu)$ , where  $|A| = \alpha n$  for  $0 < \alpha < 0.5$  and  $\mu \geq C\sqrt{\log n}$  for a sufficiently large constant  $C > 0$ . Then  $\lim_{n \rightarrow \infty} \text{Bias}(|\hat{A}_S|/n) = 0$ .

*Proof.* Let  $B_n$  be the event that  $\left| \frac{|\hat{A}_S|}{n} - |A| \right| \leq \sqrt{\frac{\log n}{n}}$ . By Theorem 3,  $P(B_n) \geq 1 - \frac{1}{n}$ . Note that when  $B_n$  does not hold, then  $\left| \frac{|\hat{A}_S|}{n} - |A| \right| \leq 1$ . So we have

$$\begin{aligned}
 |\text{Bias}(|\hat{A}_S|/n)| &\leq E \left[ \left| \frac{|\hat{A}_S|}{n} - |A| \right| \mid B_n \right] + E \left[ \left| \frac{|\hat{A}_S|}{n} - |A| \right| \mid B_n^c \right] \\
 &\leq \left( \sqrt{\frac{\log n}{n}} \right) \cdot P(B_n) + 1 \cdot P(B_n^c) \tag{70} \\
 &\leq \sqrt{\frac{\log n}{n}} + \frac{1}{n}.
 \end{aligned}$$

It follows that  $\lim_{n \rightarrow \infty} \text{Bias}(|\hat{A}_S|/n) = \lim_{n \rightarrow \infty} \left( \sqrt{\frac{\log n}{n}} + \frac{1}{n} \right) = 0$ .  $\square$

**Corollary 2.** Let  $\mathbf{X} = (X_1, \dots, X_n) \sim \text{ASD}_{P_n}(A, \mu)$ , where  $|A| = \alpha n$  for  $0 < \alpha < 0.5$  and  $\mu \geq C\sqrt{\log n}$  for a sufficiently large constant  $C > 0$ . Then  $\frac{|A \triangle \hat{A}_{GMM}|}{|A|} \leq \frac{2}{\alpha} \sqrt{\frac{\log n}{n}} = o(1)$  with probability at least  $1 - \frac{1}{n}$ .

*Proof.* By Lemma 8, with probability at least  $1 - \frac{1}{n}$  we have that  $X_i \leq 2\sqrt{\log n}$  for  $i \notin A$  and  $X_j \geq (C+2)\sqrt{\log n}$  for  $j \in A$ . Thus  $X_i \leq 2\sqrt{\log n} < (C+2)\sqrt{\log n} \leq X_j$  for all  $i \notin A$  and  $j \in A$ , which means  $A$  consists of the  $\alpha n$  largest observations  $X_i$ .

Moreover, because the responsibilities  $\hat{r}_i$  are sorted in the same order as the observations  $X_i$ , we have that  $\hat{A}_{\text{GMM}}$  consists of the  $|\hat{A}_{\text{GMM}}|$  largest observations  $X_i$ . Thus, by Theorem 3, we have

$$|\hat{A}_{\text{GMM}} \triangle A| = \left| |\hat{A}_{\text{GMM}}| - \alpha n \right| \leq \left| |\hat{A}_{\text{GMM}}| - \hat{\alpha}_{\text{GMM}} n \right| + |\hat{\alpha}_{\text{GMM}} - \alpha| \leq 2\sqrt{n \log n}. \quad (71)$$

with probability at least  $1 - \frac{1}{n}$ , for sufficiently large  $n$ . Since  $|A| = \alpha n$ , it follows that  $\frac{|\hat{A}_{\text{GMM}} \triangle A|}{|A|} \leq \frac{2}{\alpha} \sqrt{\frac{\log n}{n}} = o(1)$  as desired.  $\square$

## References

- Boscoe, F. P., Talbot, T. O., and Kulldorff, M. Public domain small-area cancer incidence data for new york state, 2005–2009. *Geospatial health*, 11(1):304–304, 04 2016. doi: 10.4081/gh.2016.304.
- Glaz, J. and Naus, J. I. *Scan Statistics*, pp. 1–7. American Cancer Society, 2010. ISBN 9780471667193.
- Kulldorff, M. A spatial scan statistic. *Communications in Statistics - Theory and Methods*, 26(6):1481–1496, 1997.
- Laurent, B. and Massart, P. Adaptive estimation of a quadratic functional by model selection. *Ann. Statist.*, 28(5):1302–1338, 10 2000.
- Liu, Y. and Arias-Castro, E. A multiscale scan statistic for adaptive submatrix localization. In *Proceedings of the 25th ACM SIGKDD International Conference on Knowledge Discovery & Data Mining*, pp. 44–53, 2019.
- Nagamochi, H., Nishimura, K., and Ibaraki, T. Computing all small cuts in undirected networks. In Du, D.-Z. and Zhang, X.-S. (eds.), *Algorithms and Computation*, pp. 190–198, Berlin, Heidelberg, 1994. Springer Berlin Heidelberg. ISBN 978-3-540-48653-4.
- Neill, D. B. An empirical comparison of spatial scan statistics for outbreak detection. *International Journal of Health Geographics*, 8(1):20, 2009.
- Neill, D. B. Fast subset scan for spatial pattern detection. *Journal of the Royal Statistical Society: Series B (Statistical Methodology)*, 74(2):337–360, 2012.
- Reyna, M. A., Chitra, U., Elyanow, R., and Raphael, B. J. Netmix: A network-structured mixture model for reduced-bias estimation of altered subnetworks. In *Research in Computational Molecular Biology*, pp. 169–185, Cham, 2020. Springer International Publishing. ISBN 978-3-030-45257-5.
- Rippl, T., Munk, A., and Sturm, A. Limit laws of the empirical wasserstein distance. *J. Multivar. Anal.*, 151(C):90–109, October 2016. ISSN 0047-259X.
- Sharpnack, J. A path algorithm for localizing anomalous activity in graphs. In *2013 IEEE Global Conference on Signal and Information Processing*, pp. 341–344, Dec 2013.
- Sharpnack, J., Krishnamurthy, A., and Singh, A. Near-optimal anomaly detection in graphs using lovász extended scan statistic. In *Proceedings of the 26th International Conference on Neural Information Processing Systems - Volume 2, NIPS’13*, pp. 1959–1967, 2013a.
- Sharpnack, J., Singh, A., and Rinaldo, A. Changepoint detection over graphs with the spectral scan statistic. In *Proceedings of the Sixteenth International Conference on Artificial Intelligence and Statistics*, pp. 545–553, 2013b.
- Weed, J. and Bach, F. Sharp asymptotic and finite-sample rates of convergence of empirical measures in wasserstein distance. *Bernoulli*, 25(4A):2620–2648, 11 2019.
