# Supplementary material
Source: ML conference proceedings conference paper supplement (https://proceedings.mlr.press/v139/chitra21a.html)
Supplement: Supplementary file 3 [file chitra21a-supp.zip]

Archive with 54 entries (49 files):
- icml_2021_supp_CAMREADY.pdf
- __MACOSX/._icml_2021_supp_CAMREADY.pdf
- code/
- __MACOSX/._code
- code/.DS_Store
- __MACOSX/code/._.DS_Store
- code/README.md
- __MACOSX/code/._README.md
- code/.gitignore
- __MACOSX/code/._.gitignore
- code/examples/
- __MACOSX/code/._examples
- code/src/
- __MACOSX/code/._src
- code/examples/.DS_Store
- __MACOSX/code/examples/._.DS_Store
- code/examples/example_commands.sh
- __MACOSX/code/examples/._example_commands.sh
- code/examples/results/
- __MACOSX/code/examples/._results
- code/examples/data/
- __MACOSX/code/examples/._data
- code/src/gmm_submatrix.py
- __MACOSX/code/src/._gmm_submatrix.py
- code/src/create_example_files.py
- __MACOSX/code/src/._create_example_files.py
- code/src/gmm_unconstrained.py
- __MACOSX/code/src/._gmm_unconstrained.py
- code/src/gmm_line.py
- __MACOSX/code/src/._gmm_line.py
- code/src/common.py
- __MACOSX/code/src/._common.py
- code/src/gmm_cutsize.py
- __MACOSX/code/src/._gmm_cutsize.py
- code/src/find_anomaly.py
- __MACOSX/code/src/._find_anomaly.py
- code/src/test.ipynb
- __MACOSX/code/src/._test.ipynb
- code/examples/results/submatrix_results.tsv
- __MACOSX/code/examples/results/._submatrix_results.tsv
- code/examples/results/line_results.tsv
- __MACOSX/code/examples/results/._line_results.tsv
- code/examples/results/unconstrained_results.tsv
- __MACOSX/code/examples/results/._unconstrained_results.tsv
- code/examples/results/cutsize_results.tsv
- __MACOSX/code/examples/results/._cutsize_results.tsv
- code/examples/data/cutsize_graph.tsv
- __MACOSX/code/examples/data/._cutsize_graph.tsv
- code/examples/data/cutsize_scores.tsv
- __MACOSX/code/examples/data/._cutsize_scores.tsv
- code/examples/data/submatrix_scores.hdf5
- __MACOSX/code/examples/data/._submatrix_scores.hdf5
- code/examples/data/line_scores.tsv
- __MACOSX/code/examples/data/._line_scores.tsv
