# Supplementary material
Source: ML conference proceedings conference paper supplement (https://proceedings.mlr.press/v139/chitra21a.html)
Supplement: Supplementary file 3 [file chitra21a-supp.zip › code/examples/data/cutsize_graph.tsv]

0	1
0	10
1	2
1	11
2	3
2	12
3	4
3	13
4	5
4	14
5	6
5	15
6	7
6	16
7	8
7	17
8	9
8	18
9	19
10	11
10	20
11	12
11	21
12	13
12	22
13	14
13	23
14	15
14	24
15	16
15	25
16	17
16	26
17	18
17	27
18	19
18	28
19	29
20	21
20	30
21	22
21	31
22	23
22	32
23	24
23	33
24	25
24	34
25	26
25	35
26	27
26	36
27	28
27	37
28	29
28	38
29	39
30	31
30	40
31	32
31	41
32	33
32	42
33	34
33	43
34	35
34	44
35	36
35	45
36	37
36	46
37	38
37	47
38	39
38	48
39	49
40	41
40	50
41	42
41	51
42	43
42	52
43	44
43	53
44	45
44	54
45	46
45	55
46	47
46	56
47	48
47	57
48	49
48	58
49	59
50	51
50	60
51	52
51	61
52	53
52	62
53	54
53	63
54	55
54	64
55	56
55	65
56	57
56	66
57	58
57	67
58	59
58	68
59	69
60	61
60	70
61	62
61	71
62	63
62	72
63	64
63	73
64	65
64	74
65	66
65	75
66	67
66	76
67	68
67	77
68	69
68	78
69	79
70	71
70	80
71	72
71	81
72	73
72	82
73	74
73	83
74	75
74	84
75	76
75	85
76	77
76	86
77	78
77	87
78	79
78	88
79	89
80	81
80	90
81	82
81	91
82	83
82	92
83	84
83	93
84	85
84	94
85	86
85	95
86	87
86	96
87	88
87	97
88	89
88	98
89	99
90	91
90	100
91	92
91	101
92	93
92	102
93	94
93	103
94	95
94	104
95	96
95	105
96	97
96	106
97	98
97	107
98	99
98	108
99	109
100	101
100	110
101	102
101	111
102	103
102	112
103	104
103	113
104	105
104	114
105	106
105	115
106	107
106	116
107	108
107	117
108	109
108	118
109	119
110	111
110	120
111	112
111	121
112	113
112	122
113	114
113	123
114	115
114	124
115	116
115	125
116	117
116	126
117	118
117	127
118	119
118	128
119	129
120	121
120	130
121	122
121	131
122	123
122	132
123	124
123	133
124	125
124	134
125	126
125	135
126	127
126	136
127	128
127	137
128	129
128	138
129	139
130	131
130	140
131	132
131	141
132	133
132	142
133	134
133	143
134	135
134	144
135	136
135	145
136	137
136	146
137	138
137	147
138	139
138	148
139	149
140	141
141	142
142	143
143	144
144	145
145	146
146	147
147	148
148	149
