# Supplementary material
Source: ML conference proceedings conference paper supplement (https://proceedings.mlr.press/v139/chitra21a.html)
Supplement: Supplementary file 3 [file chitra21a-supp.zip › code/examples/results/cutsize_results.tsv]

0
1
2
3
4
5
6
7
8
9
140
141
142
143
144
