# Supplementary material
Source: ML conference proceedings conference paper supplement (https://proceedings.mlr.press/v139/chitra21a.html)
Supplement: Supplementary file 3 [file chitra21a-supp.zip › code/examples/results/line_results.tsv]

35
36
37
38
39
40
41
42
43
44
45
46
47
