# Supplementary material
Source: ML conference proceedings conference paper supplement (https://proceedings.mlr.press/v139/chitra21a.html)
Supplement: Supplementary file 3 [file chitra21a-supp.zip › code/examples/results/submatrix_results.tsv]

I_pred: [0, 1, 2, 3, 4]J_pred: [0, 1, 2, 3, 4]
