# Supplementary material
Source: ML conference proceedings conference paper supplement (https://proceedings.mlr.press/v139/chitra21a.html)
Supplement: Supplementary file 3 [file chitra21a-supp.zip › code/examples/results/unconstrained_results.tsv]

142
140
8
144
9
1
2
141
6
143
3
7
5
0
4
