# Supplementary material
Source: ML conference proceedings conference paper supplement (https://proceedings.mlr.press/v139/chitra21a.html)
Supplement: Supplementary file 3 [file chitra21a-supp.zip › code/src/test.ipynb]

# %% [code]
from common import save_matrix
import numpy as np
import csv

# %% [code]
names = list(range(100))
scores = np.random.rand(100)
scores[45:68] += 1

# %% [code]
print(list2)

# %% [code]
with open('../examples/line_scores.tsv', 'w') as tsvfile:
    writer = csv.writer(tsvfile, delimiter='\t')
    for i in range(len(list1)):
        writer.writerow([list1[i], list2[i]])
